# Supplementary material for: An Alliance of Polynitrogen Heterocycles: Novel Energetic Tetrazinedioxide-Hydroxytetrazole-Based Materials
Source: MDPI journal article supplement (doi:10.3390/molecules27185891), 2022-09-11

# **Supporting Information for**

## **An Alliance of Polynitrogen Heterocycles: Novel Energetic Tetrazinedioxide-Hydroxytetrazole-Based Materials**

Dmitry M. Bystrov,<sup>1</sup> Alla N. Pivkina,<sup>2</sup> Leonid L. Fershtat<sup>1\*</sup>

<sup>1</sup> N. D. Zelinsky Institute of Organic Chemistry, Russian Academy of Sciences

Leninsky Prosp. 47, Moscow 119991 (Russian Federation). E-mail: [fershtat@ioc.ac.ru](mailto:fershtat@ioc.ac.ru)

<sup>2</sup> N. N. Semenov Federal Research Center for Chemical Physics, Russian Academy of Sciences,  
4 Kosygin Str., Moscow 119991 (Russian Federation)

### Table of Contents

|                                 |   |
|---------------------------------|---|
| S1. Crystallographic data ..... | 2 |
| S2. Copies of NMR spectra.....  | 9 |

## S1. Crystallographic data

Table S1. Crystal data and structure refinement for **11**.

|                                   |                                                              |                    |
|-----------------------------------|--------------------------------------------------------------|--------------------|
| Identification code               | <b>11</b>                                                    |                    |
| Empirical formula                 | C <sub>3</sub> H <sub>8</sub> N <sub>10</sub> O <sub>5</sub> |                    |
| Formula weight                    | 264.19                                                       |                    |
| Temperature                       | 100.0(1) K                                                   |                    |
| Wavelength                        | 1.54184 Å                                                    |                    |
| Crystal system                    | Monoclinic                                                   |                    |
| Space group                       | P 2 <sub>1</sub> /n                                          |                    |
| Unit cell dimensions              | a = 9.22694(10) Å                                            | α = 90°.           |
|                                   | b = 9.24085(7) Å                                             | β = 107.6990(10)°. |
|                                   | c = 11.66575(1) Å                                            | γ = 90°.           |
| Volume                            | 947.596(14) Å <sup>3</sup>                                   |                    |
| Z                                 | 4                                                            |                    |
| Density (calculated)              | 1.852 g/cm <sup>3</sup>                                      |                    |
| Absorption coefficient            | 1.488 mm <sup>-1</sup>                                       |                    |
| F(000)                            | 544                                                          |                    |
| Crystal size                      | 0.22 x 0.11 x 0.09 mm <sup>3</sup>                           |                    |
| Theta range for data collection   | 5.384 to 79.644°.                                            |                    |
| Index ranges                      | -11 ≤ h ≤ 10, -11 ≤ k ≤ 7, -14 ≤ l ≤ 14                      |                    |
| Reflections collected             | 10971                                                        |                    |
| Independent reflections           | 2052 [R(int) = 0.0250]                                       |                    |
| Observed reflections              | 1971                                                         |                    |
| Completeness to theta = 67.684°   | 99.9 %                                                       |                    |
| Absorption correction             | Analytical                                                   |                    |
| Max. and min. transmission        | 0.900 and 0.808                                              |                    |
| Refinement method                 | Full-matrix least-squares on F <sup>2</sup>                  |                    |
| Data / restraints / parameters    | 2052 / 0 / 196                                               |                    |
| Goodness-of-fit on F <sup>2</sup> | 1.060                                                        |                    |
| Final R indices [I > 2σ(I)]       | R1 = 0.0290, wR2 = 0.0790                                    |                    |
| R indices (all data)              | R1 = 0.0299, wR2 = 0.0798                                    |                    |
| Extinction coefficient            | 0.0018(3)                                                    |                    |
| Largest diff. peak and hole       | 0.366 and -0.231 e.Å <sup>-3</sup>                           |                    |

Table S2. Atomic coordinates ( $\times 10^4$ ) and equivalent isotropic displacement parameters ( $\text{\AA}^2 \times 10^3$ ) for **11**.  $U(\text{eq})$  is defined as one third of the trace of the orthogonalized  $U^{ij}$  tensor.

|       | x       | y       | z       | $U(\text{eq})$ |
|-------|---------|---------|---------|----------------|
| N(1)  | 2326(1) | 5053(1) | 5081(1) | 11(1)          |
| C(1)  | 3082(1) | 4967(1) | 4257(1) | 11(1)          |
| O(2)  | 6112(1) | 6641(1) | 2052(1) | 15(1)          |
| N(2)  | 1916(1) | 3711(1) | 5298(1) | 14(1)          |
| C(2)  | 3727(1) | 6176(1) | 3760(1) | 11(1)          |
| O(3)  | 3646(1) | 9874(1) | 3701(1) | 15(1)          |
| N(3)  | 2442(1) | 2832(1) | 4633(1) | 14(1)          |
| C(3)  | 4986(1) | 8324(1) | 2902(1) | 11(1)          |
| O(4)  | 1403(1) | 9773(1) | 4737(1) | 17(1)          |
| N(4)  | 3171(1) | 3576(1) | 3982(1) | 13(1)          |
| O(5)  | -363(1) | 7391(1) | 2104(1) | 15(1)          |
| N(5)  | 4649(1) | 5790(1) | 3116(1) | 12(1)          |
| N(6)  | 5251(1) | 6889(1) | 2681(1) | 11(1)          |
| N(7)  | 4000(1) | 8562(1) | 3546(1) | 11(1)          |
| N(8)  | 3345(1) | 7503(1) | 3989(1) | 12(1)          |
| N(9)  | 5615(1) | 9385(1) | 2480(1) | 14(1)          |
| N(10) | 510(1)  | 8500(1) | 4425(1) | 14(1)          |
| O(1)  | 2041(1) | 6178(1) | 5671(1) | 14(1)          |

Table S3. Bond lengths [Å] and angles [°] for **11**.

|                |            |
|----------------|------------|
| N(1)-C(1)      | 1.3507(14) |
| N(1)-N(2)      | 1.3426(13) |
| N(1)-O(1)      | 1.3171(12) |
| C(1)-C(2)      | 1.4653(14) |
| C(1)-N(4)      | 1.3331(14) |
| O(2)-N(6)      | 1.2559(12) |
| N(2)-N(3)      | 1.3136(14) |
| C(2)-N(5)      | 1.3429(13) |
| C(2)-N(8)      | 1.3256(14) |
| O(3)-N(7)      | 1.2828(12) |
| N(3)-N(4)      | 1.3470(13) |
| C(3)-N(6)      | 1.3869(14) |
| C(3)-N(7)      | 1.3620(13) |
| C(3)-N(9)      | 1.3092(14) |
| O(4)-N(10)     | 1.4185(12) |
| O(4)-H(4)      | 0.89(2)    |
| O(5)-H(51)     | 0.85(2)    |
| O(5)-H(52)     | 0.88(2)    |
| N(5)-N(6)      | 1.3298(12) |
| N(7)-N(8)      | 1.3343(13) |
| N(9)-H(92)     | 0.886(19)  |
| N(9)-H(91)     | 0.896(19)  |
| N(10)-H(101)   | 0.933(17)  |
| N(10)-H(102)   | 0.929(18)  |
| N(10)-H(103)   | 0.926(18)  |
|                |            |
| N(2)-N(1)-C(1) | 108.44(9)  |
| O(1)-N(1)-C(1) | 130.27(9)  |
| O(1)-N(1)-N(2) | 121.21(9)  |
| N(1)-C(1)-C(2) | 126.62(9)  |
| N(4)-C(1)-N(1) | 108.08(9)  |
| N(4)-C(1)-C(2) | 125.29(10) |
| N(3)-N(2)-N(1) | 106.51(9)  |
| N(5)-C(2)-C(1) | 114.91(9)  |
| N(8)-C(2)-C(1) | 117.44(9)  |

|                     |            |
|---------------------|------------|
| N(8)-C(2)-N(5)      | 127.65(10) |
| N(2)-N(3)-N(4)      | 110.74(9)  |
| N(7)-C(3)-N(6)      | 116.22(9)  |
| N(9)-C(3)-N(6)      | 121.51(10) |
| N(9)-C(3)-N(7)      | 122.23(10) |
| N(10)-O(4)-H(4)     | 107.4(13)  |
| C(1)-N(4)-N(3)      | 106.21(9)  |
| H(51)-O(5)-H(52)    | 104.1(18)  |
| N(6)-N(5)-C(2)      | 114.82(9)  |
| O(2)-N(6)-C(3)      | 117.49(9)  |
| O(2)-N(6)-N(5)      | 119.71(9)  |
| N(5)-N(6)-C(3)      | 122.80(9)  |
| O(3)-N(7)-C(3)      | 118.17(9)  |
| O(3)-N(7)-N(8)      | 118.27(8)  |
| N(8)-N(7)-C(3)      | 123.52(9)  |
| C(2)-N(8)-N(7)      | 114.90(9)  |
| C(3)-N(9)-H(92)     | 118.3(11)  |
| C(3)-N(9)-H(91)     | 118.4(12)  |
| H(92)-N(9)-H(91)    | 123.2(17)  |
| O(4)-N(10)-H(101)   | 112.7(10)  |
| O(4)-N(10)-H(102)   | 110.5(10)  |
| O(4)-N(10)-H(103)   | 105.1(11)  |
| H(101)-N(10)-H(102) | 108.7(14)  |
| H(101)-N(10)-H(103) | 109.8(15)  |
| H(102)-N(10)-H(103) | 110.0(15)  |

---

Table S4. Anisotropic displacement parameters ( $\text{\AA}^2 \times 10^3$ ) for **11**. The anisotropic displacement factor exponent takes the form:  $-2\pi^2 [h^2 a^{*2} U^{11} + \dots + 2 h k a^* b^* U^{12}]$

|       | $U^{11}$ | $U^{22}$ | $U^{33}$ | $U^{23}$ | $U^{13}$ | $U^{12}$ |
|-------|----------|----------|----------|----------|----------|----------|
| N(1)  | 12(1)    | 11(1)    | 12(1)    | 0(1)     | 5(1)     | 0(1)     |
| C(1)  | 11(1)    | 12(1)    | 12(1)    | 1(1)     | 5(1)     | 1(1)     |
| O(2)  | 17(1)    | 16(1)    | 16(1)    | 0(1)     | 12(1)    | 2(1)     |
| N(2)  | 15(1)    | 12(1)    | 15(1)    | 1(1)     | 5(1)     | -2(1)    |
| C(2)  | 11(1)    | 12(1)    | 10(1)    | 0(1)     | 3(1)     | 0(1)     |
| O(3)  | 19(1)    | 8(1)     | 21(1)    | 0(1)     | 12(1)    | 2(1)     |
| N(3)  | 16(1)    | 12(1)    | 15(1)    | 1(1)     | 6(1)     | -2(1)    |
| C(3)  | 11(1)    | 12(1)    | 11(1)    | 1(1)     | 5(1)     | 1(1)     |
| O(4)  | 19(1)    | 12(1)    | 26(1)    | -4(1)    | 14(1)    | -3(1)    |
| N(4)  | 15(1)    | 11(1)    | 14(1)    | 1(1)     | 5(1)     | -1(1)    |
| O(5)  | 16(1)    | 14(1)    | 17(1)    | 2(1)     | 8(1)     | 1(1)     |
| N(5)  | 14(1)    | 11(1)    | 13(1)    | 2(1)     | 6(1)     | 0(1)     |
| N(6)  | 12(1)    | 12(1)    | 11(1)    | 1(1)     | 6(1)     | 1(1)     |
| N(7)  | 12(1)    | 10(1)    | 13(1)    | 1(1)     | 6(1)     | 0(1)     |
| N(8)  | 13(1)    | 11(1)    | 13(1)    | 2(1)     | 6(1)     | 0(1)     |
| N(9)  | 17(1)    | 12(1)    | 17(1)    | 0(1)     | 10(1)    | 0(1)     |
| N(10) | 15(1)    | 12(1)    | 17(1)    | -1(1)    | 7(1)     | 0(1)     |
| O(1)  | 17(1)    | 12(1)    | 15(1)    | -2(1)    | 10(1)    | 1(1)     |

Table S5. Hydrogen coordinates ( $\times 10^4$ ) and isotropic displacement parameters ( $\text{\AA}^2 \times 10^{-3}$ ) for **11**.

|        | x         | y         | z        | U(eq) |
|--------|-----------|-----------|----------|-------|
| H(92)  | 5482(19)  | 10280(20) | 2699(15) | 26(4) |
| H(101) | 197(18)   | 8322(18)  | 3599(16) | 23(4) |
| H(91)  | 6190(20)  | 9170(20)  | 2012(17) | 35(5) |
| H(102) | 1049(18)  | 7701(19)  | 4818(15) | 24(4) |
| H(103) | -330(20)  | 8662(19)  | 4684(16) | 29(4) |
| H(4)   | 2120(20)  | 9730(20)  | 4368(18) | 36(5) |
| H(51)  | 310(20)   | 7630(20)  | 1776(17) | 34(5) |
| H(52)  | -1200(20) | 7830(20)  | 1664(19) | 43(5) |

Table S6. Torsion angles [°] for **11**.

---

|                     |             |
|---------------------|-------------|
| N(1)-C(1)-C(2)-N(5) | 168.90(10)  |
| N(1)-C(1)-C(2)-N(8) | -11.07(16)  |
| N(1)-C(1)-N(4)-N(3) | 0.95(11)    |
| N(1)-N(2)-N(3)-N(4) | -0.59(11)   |
| C(1)-N(1)-N(2)-N(3) | 1.17(11)    |
| C(1)-C(2)-N(5)-N(6) | -179.03(8)  |
| C(1)-C(2)-N(8)-N(7) | 178.09(9)   |
| N(2)-N(1)-C(1)-C(2) | 179.79(9)   |
| N(2)-N(1)-C(1)-N(4) | -1.33(12)   |
| N(2)-N(3)-N(4)-C(1) | -0.23(11)   |
| C(2)-C(1)-N(4)-N(3) | 179.85(9)   |
| C(2)-N(5)-N(6)-O(2) | -178.97(9)  |
| C(2)-N(5)-N(6)-C(3) | 1.84(14)    |
| O(3)-N(7)-N(8)-C(2) | 177.85(9)   |
| C(3)-N(7)-N(8)-C(2) | 0.08(14)    |
| N(4)-C(1)-C(2)-N(5) | -9.80(15)   |
| N(4)-C(1)-C(2)-N(8) | 170.23(10)  |
| N(5)-C(2)-N(8)-N(7) | -1.88(15)   |
| N(6)-C(3)-N(7)-O(3) | -175.44(9)  |
| N(6)-C(3)-N(7)-N(8) | 2.34(15)    |
| N(7)-C(3)-N(6)-O(2) | 177.43(8)   |
| N(7)-C(3)-N(6)-N(5) | -3.36(15)   |
| N(8)-C(2)-N(5)-N(6) | 0.94(16)    |
| N(9)-C(3)-N(6)-O(2) | -0.41(15)   |
| N(9)-C(3)-N(6)-N(5) | 178.80(9)   |
| N(9)-C(3)-N(7)-O(3) | 2.38(15)    |
| N(9)-C(3)-N(7)-N(8) | -179.84(10) |
| O(1)-N(1)-C(1)-C(2) | -3.49(18)   |
| O(1)-N(1)-C(1)-N(4) | 175.39(10)  |
| O(1)-N(1)-N(2)-N(3) | -175.91(9)  |

---



Table S7. Hydrogen bonds for **11** [Å and °].

| D-H...A               | d(D-H)    | d(H...A)  | d(D...A)   | <(DHA)    |
|-----------------------|-----------|-----------|------------|-----------|
| N(9)-H(92)...O(5)#1   | 0.886(19) | 1.971(19) | 2.8420(13) | 167.4(16) |
| N(10)-H(101)...O(5)   | 0.933(17) | 1.870(17) | 2.7752(13) | 162.8(15) |
| N(9)-H(91)...O(1)#2   | 0.896(19) | 1.98(2)   | 2.8538(12) | 166.5(17) |
| N(10)-H(102)...O(1)   | 0.929(18) | 1.804(18) | 2.7321(12) | 175.8(16) |
| N(10)-H(103)...O(4)#3 | 0.926(18) | 1.983(18) | 2.7692(13) | 141.5(15) |
| O(4)-H(4)...O(3)      | 0.89(2)   | 1.81(2)   | 2.6965(11) | 172.8(19) |
| O(4)-H(4)...N(8)      | 0.89(2)   | 2.45(2)   | 3.0534(12) | 124.9(16) |
| O(5)-H(51)...N(4)#1   | 0.85(2)   | 2.07(2)   | 2.9074(13) | 169.7(18) |
| O(5)-H(52)...O(1)#4   | 0.88(2)   | 1.92(2)   | 2.8011(11) | 178(2)    |

Symmetry transformations used to generate equivalent atoms:

#1 -x+1/2,y+1/2,-z+1/2    #2 x+1/2,-y+3/2,z-1/2

#3 -x,-y+2,-z+1    #4 x-1/2,-y+3/2,z-1/2

## S2. Copies of NMR spectra

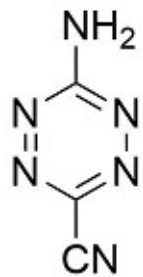

1

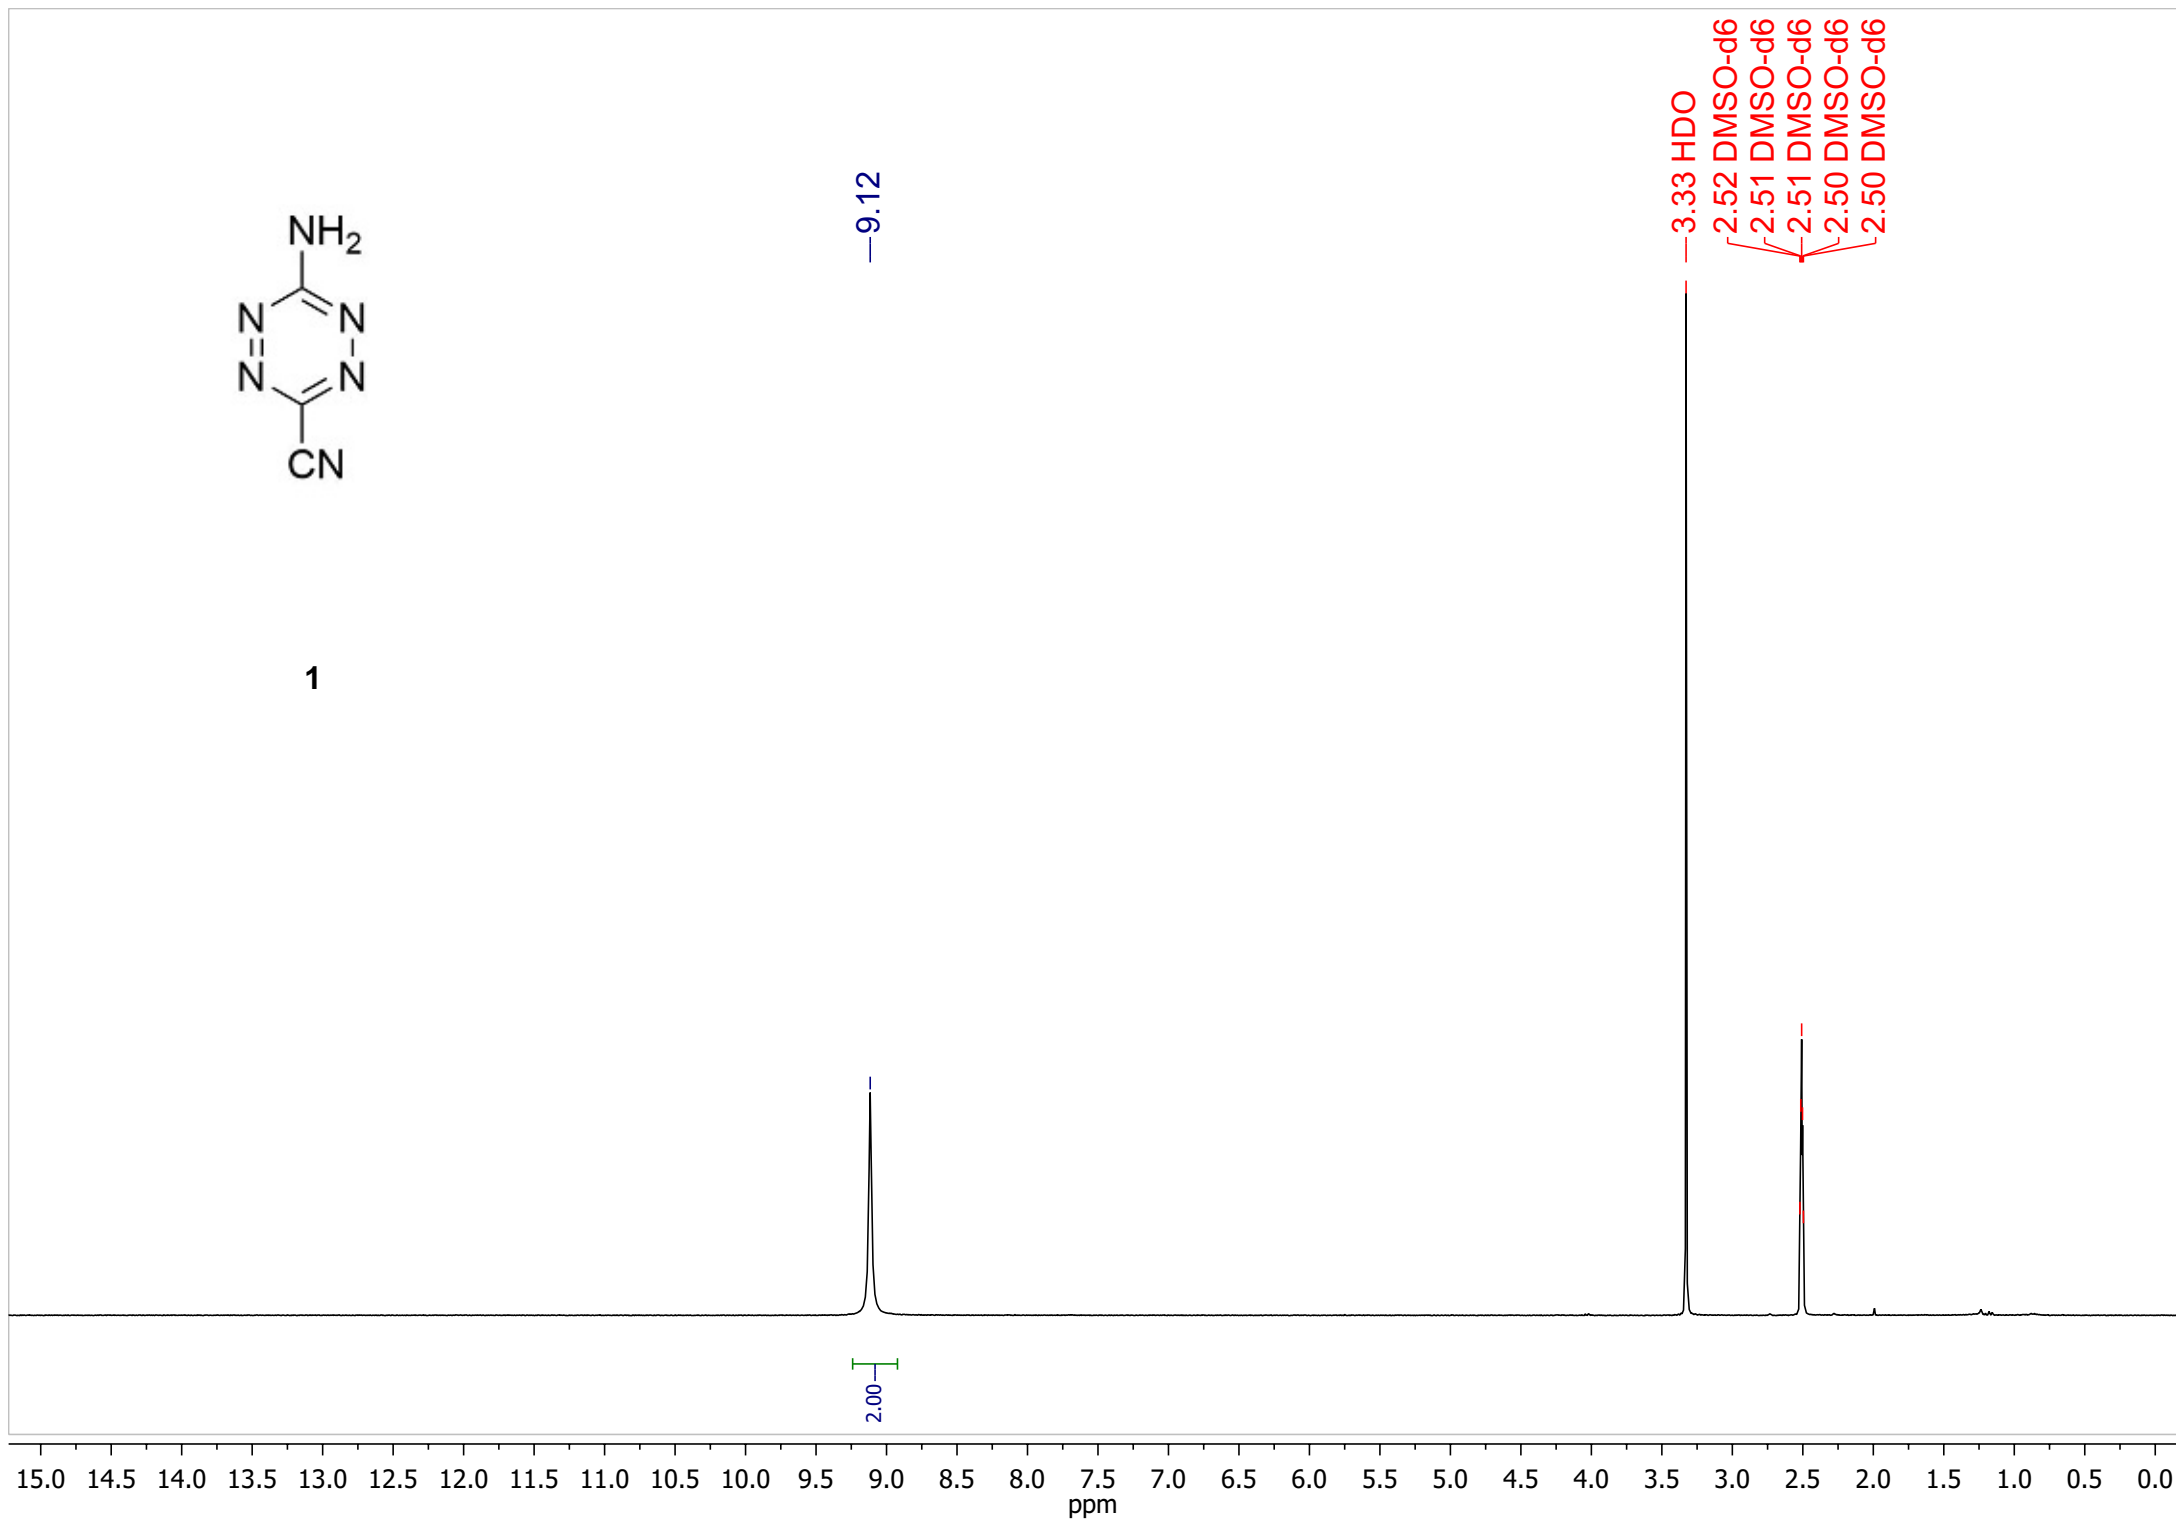

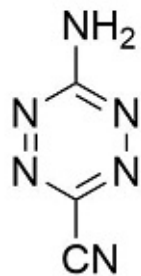

1

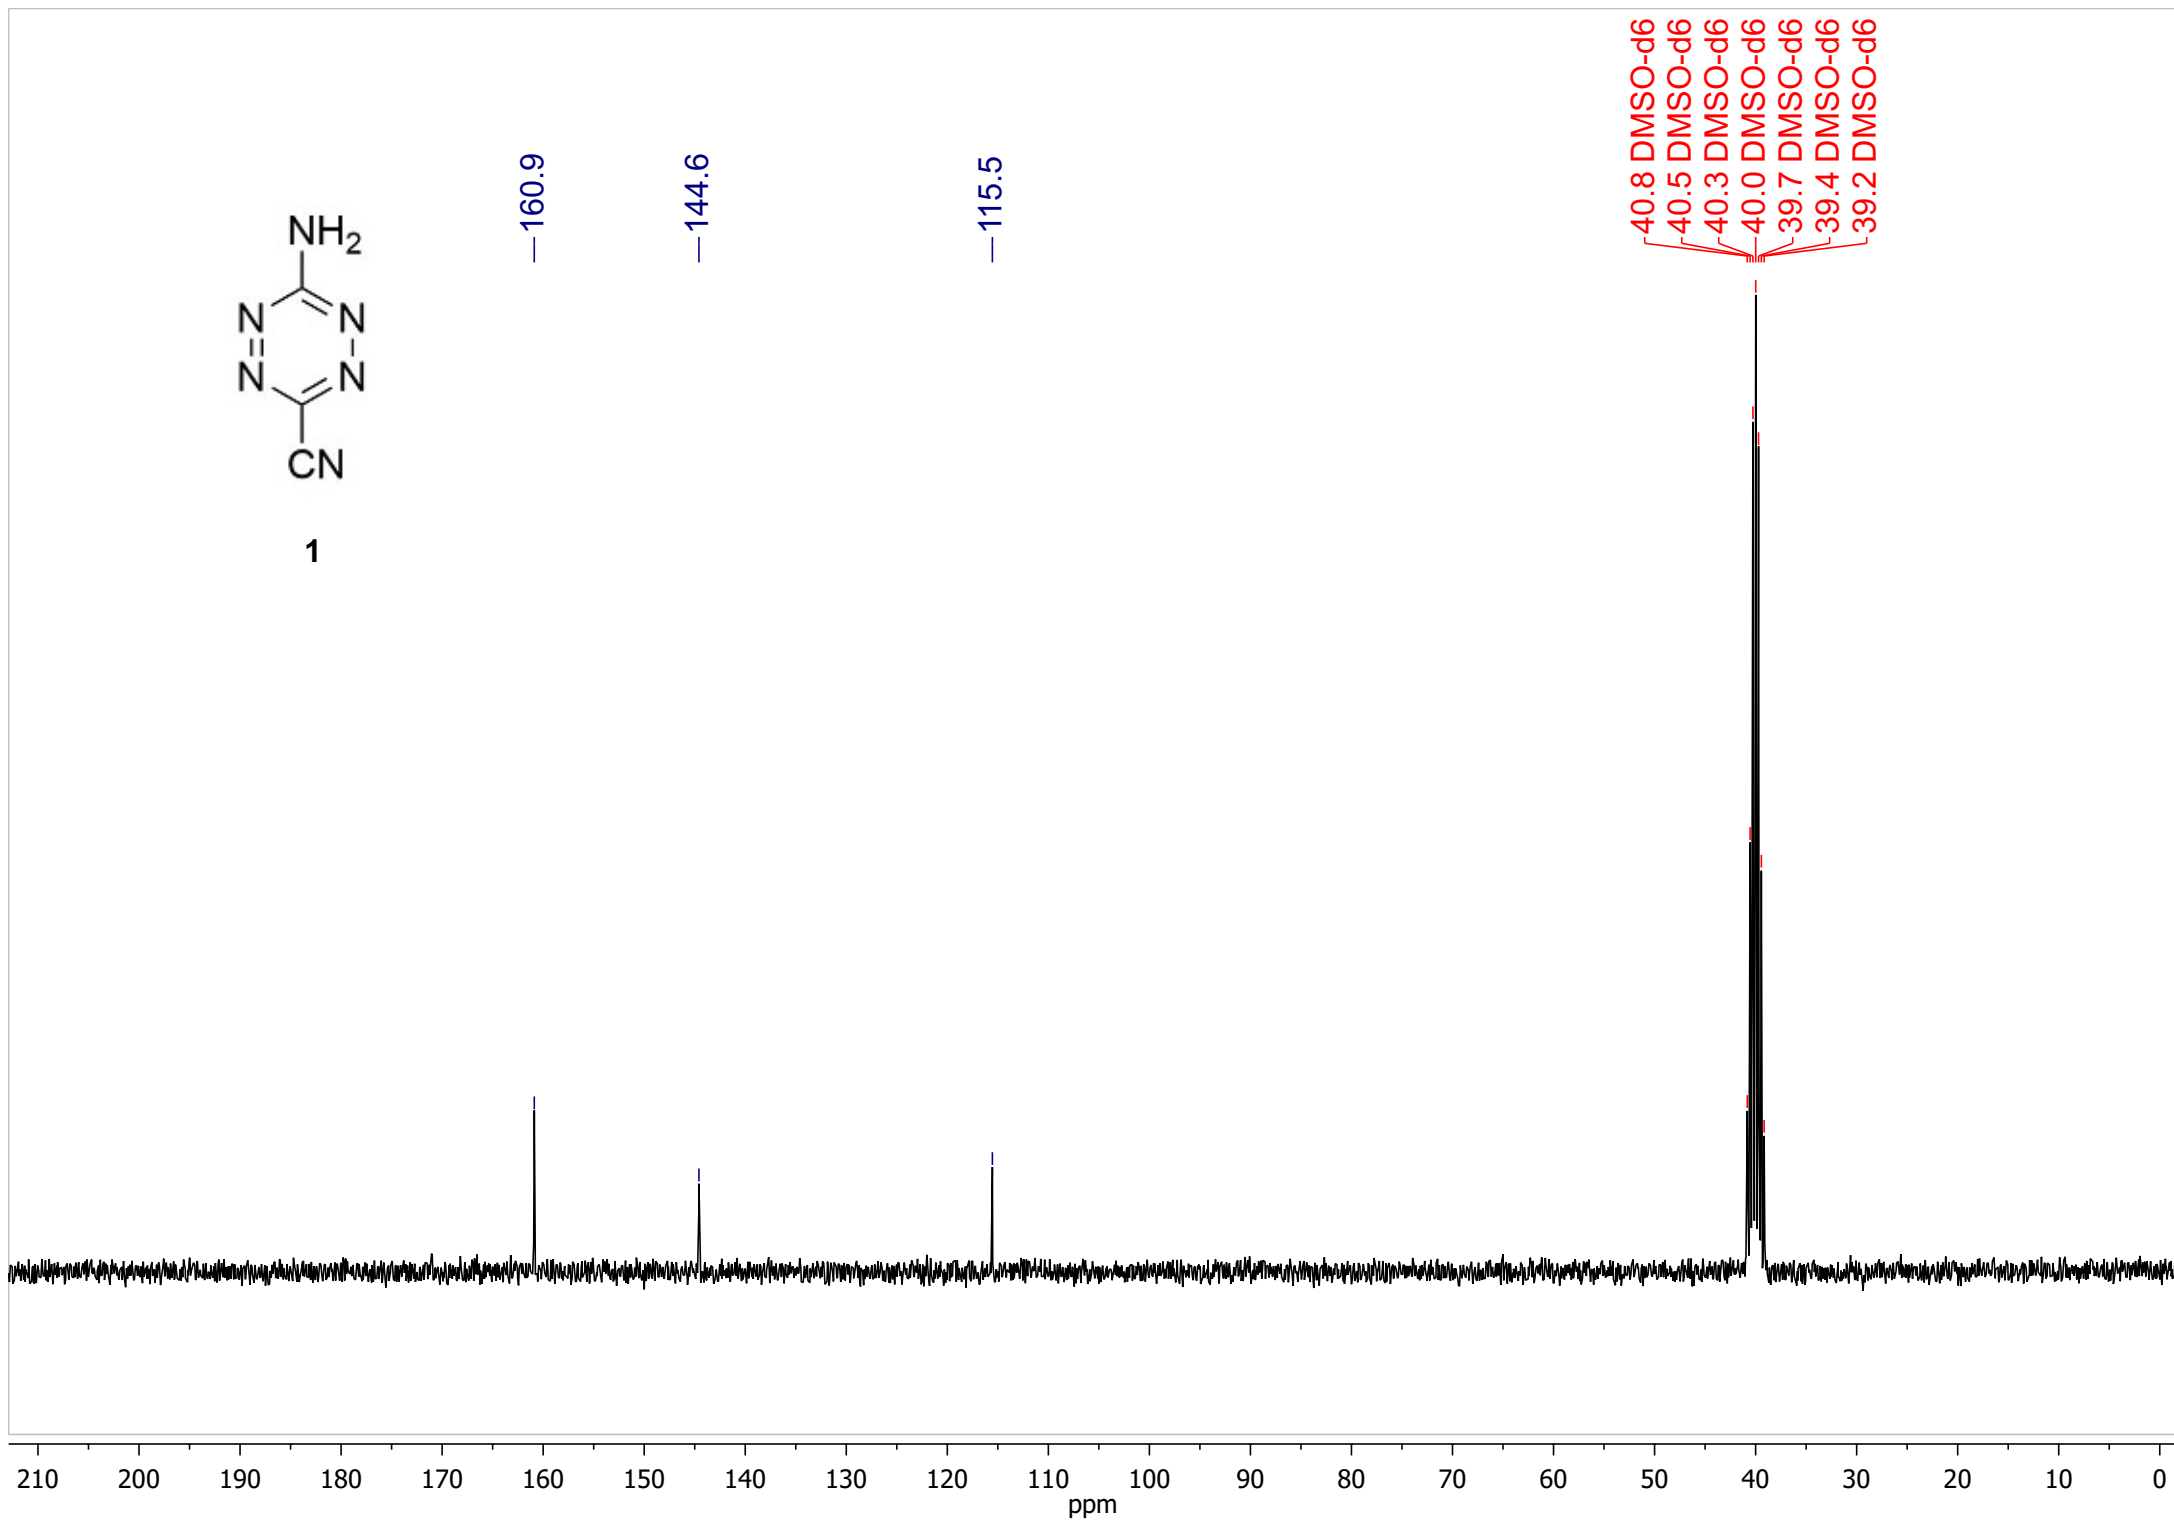

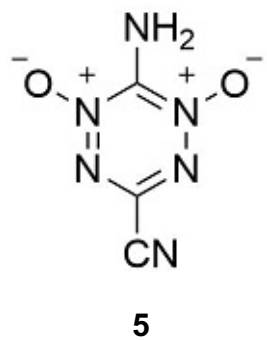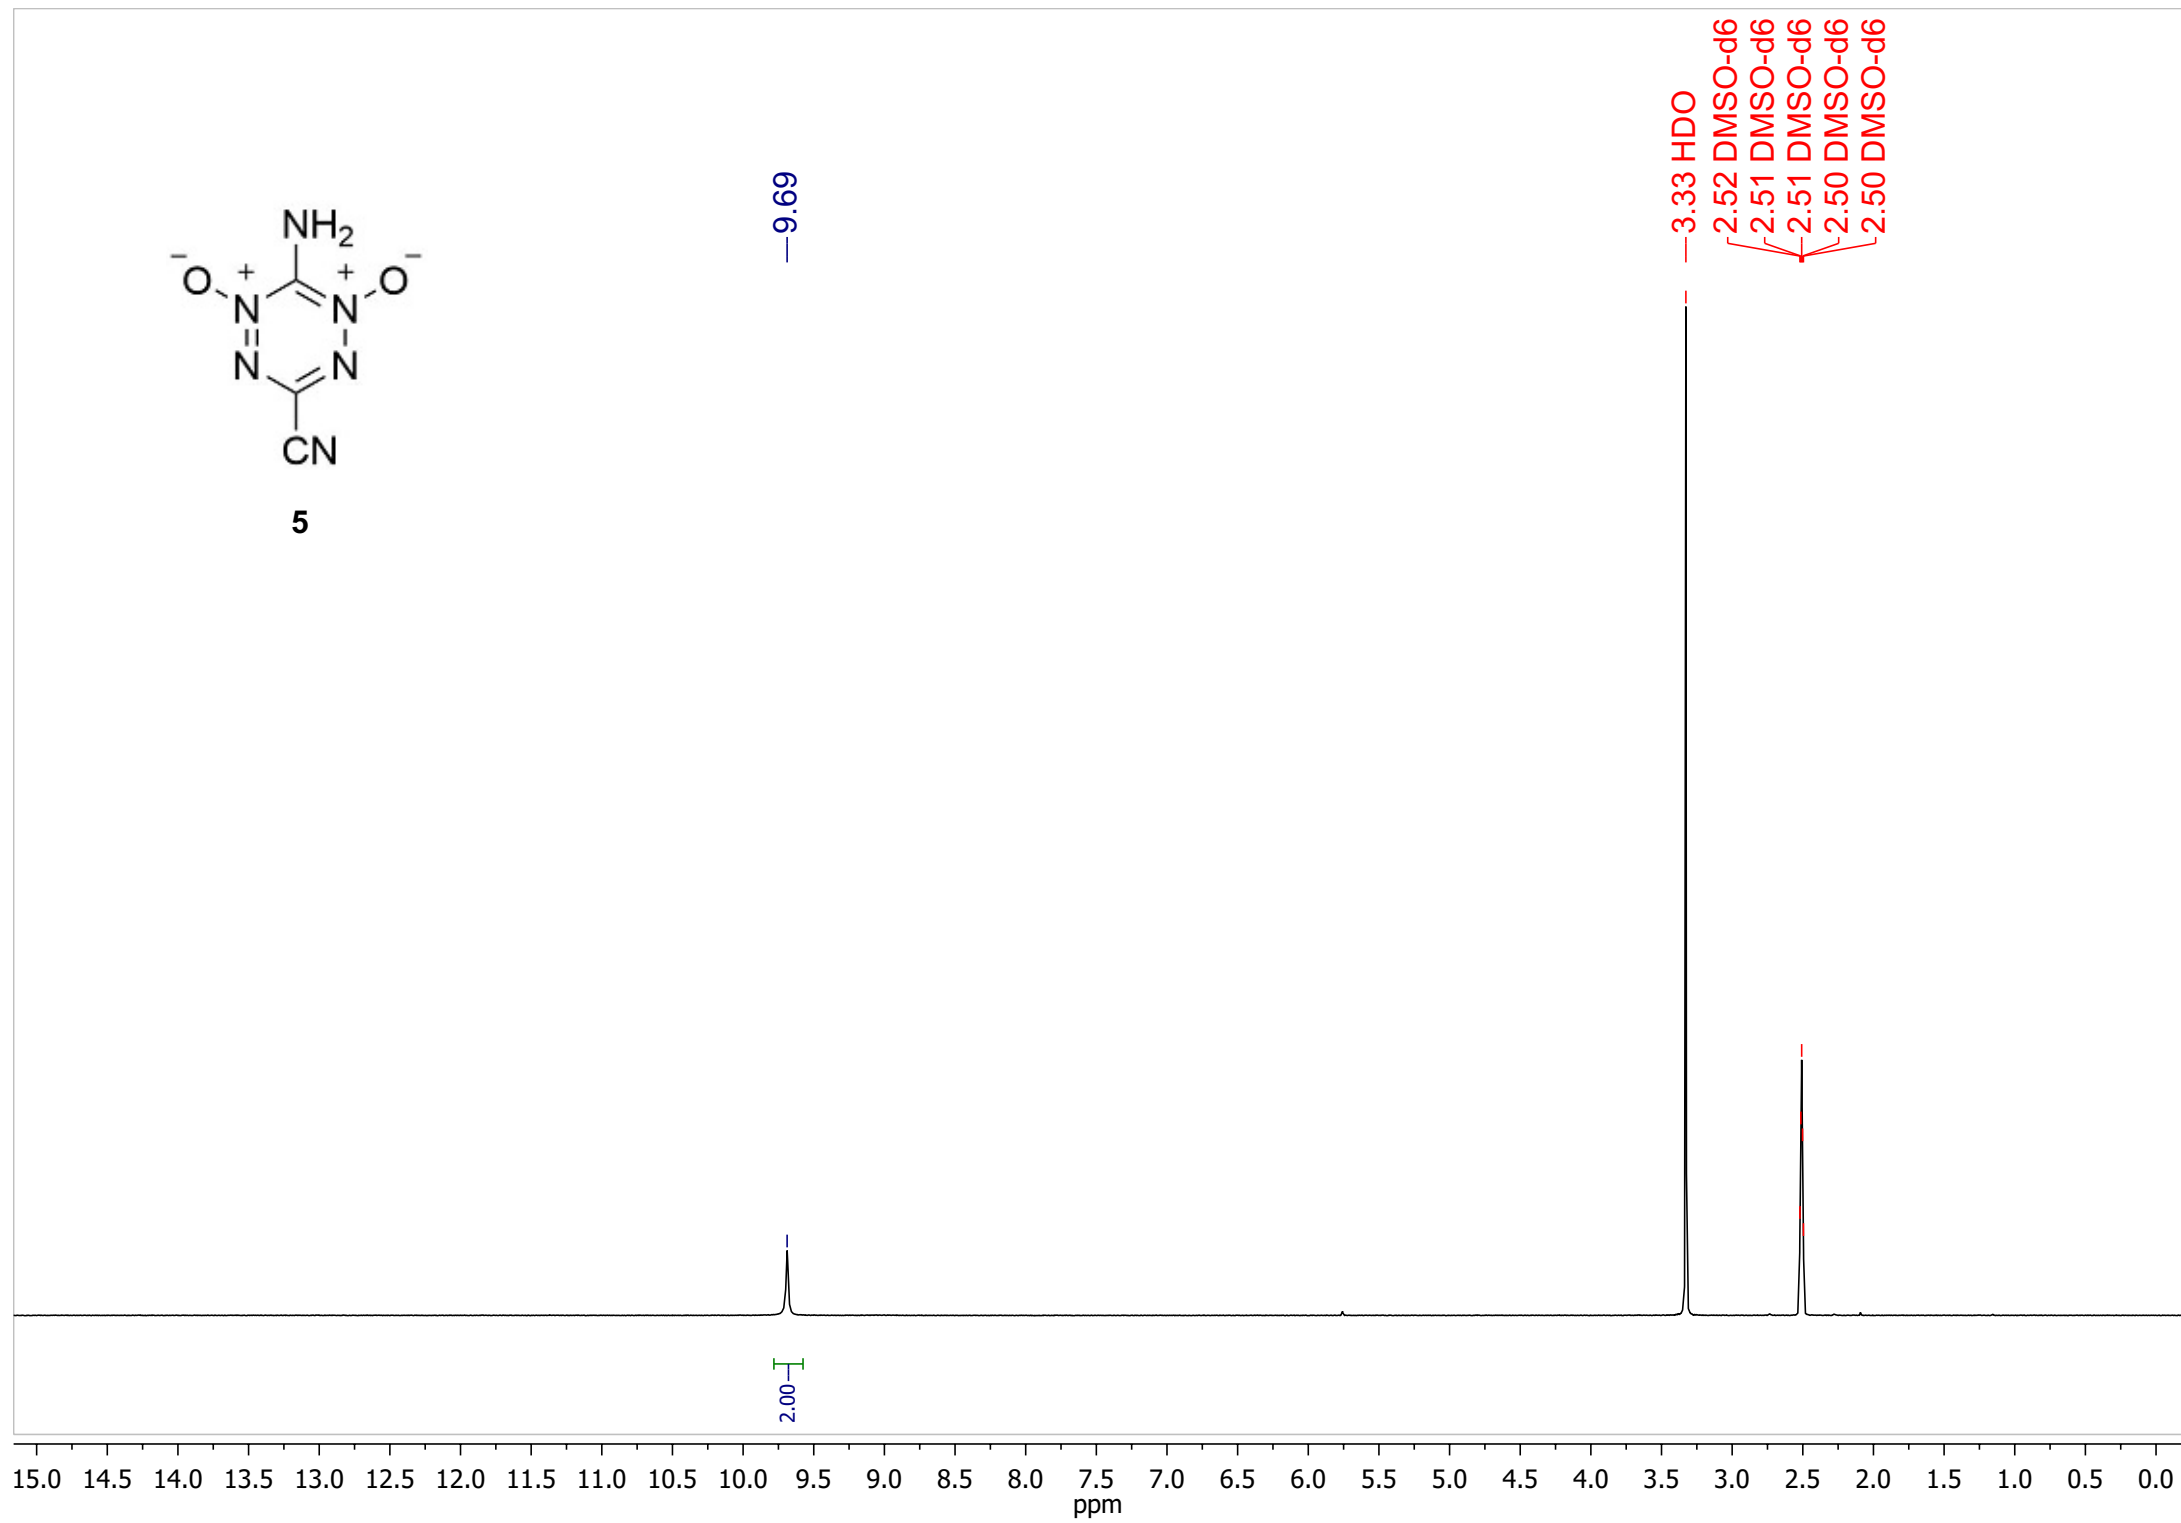

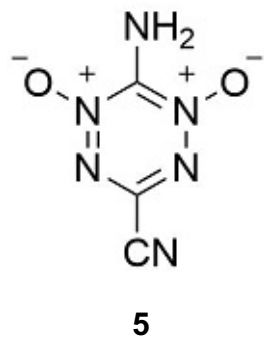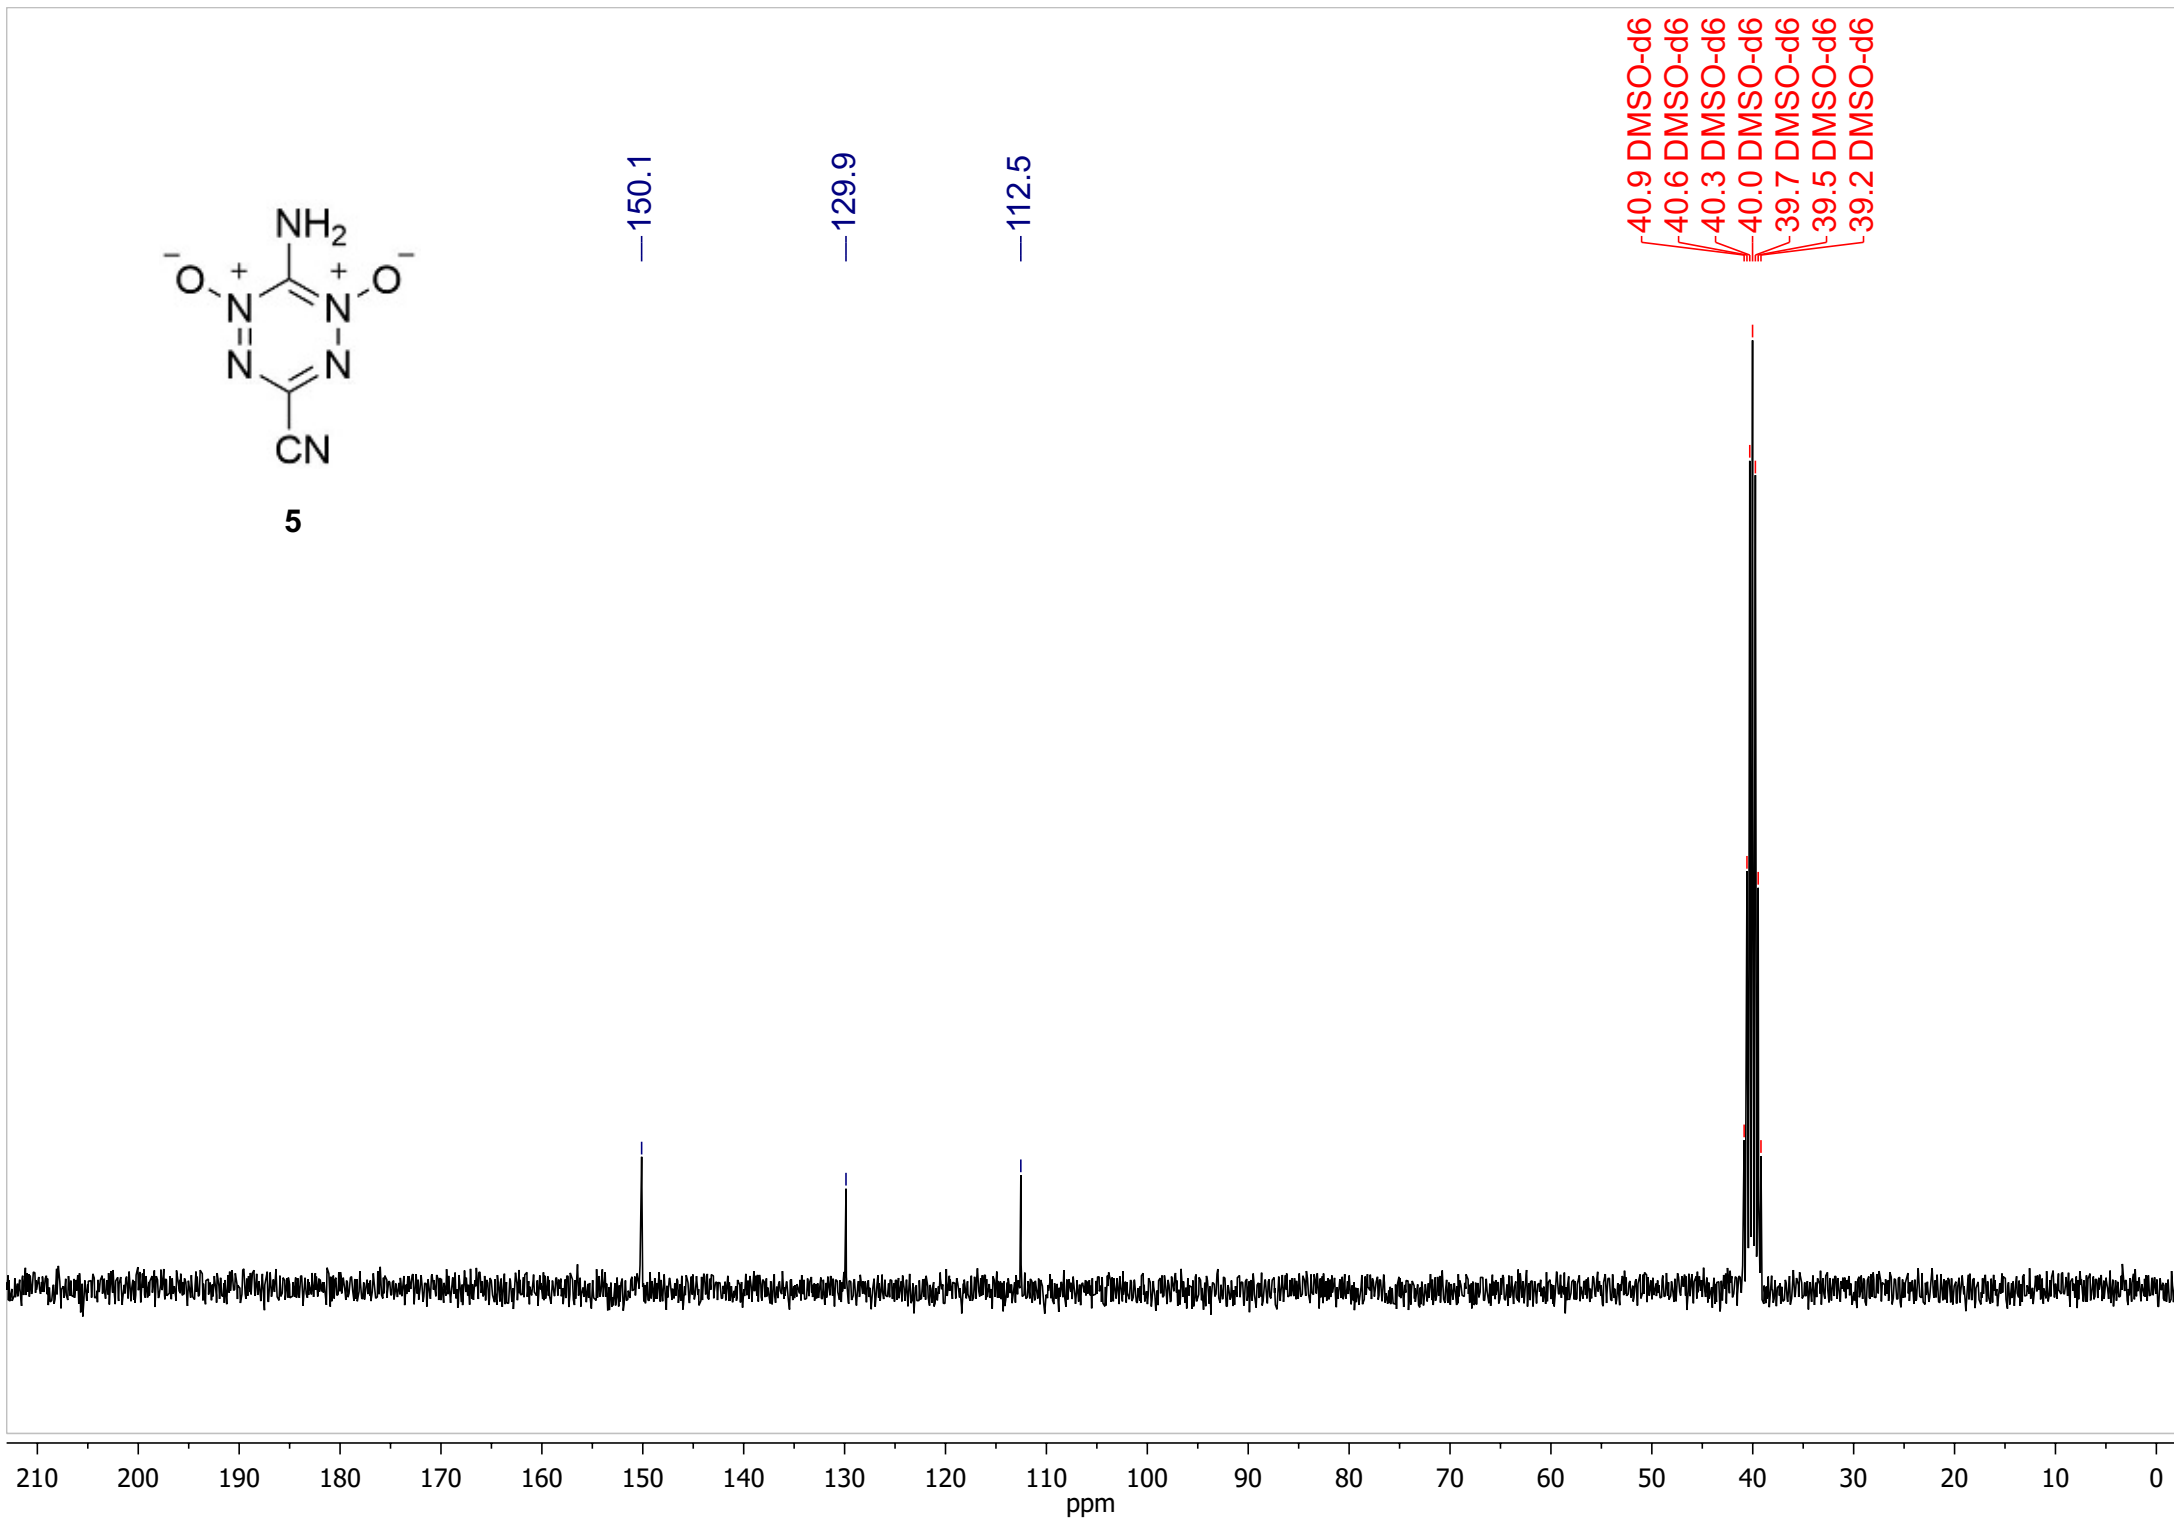

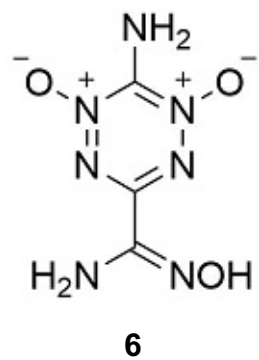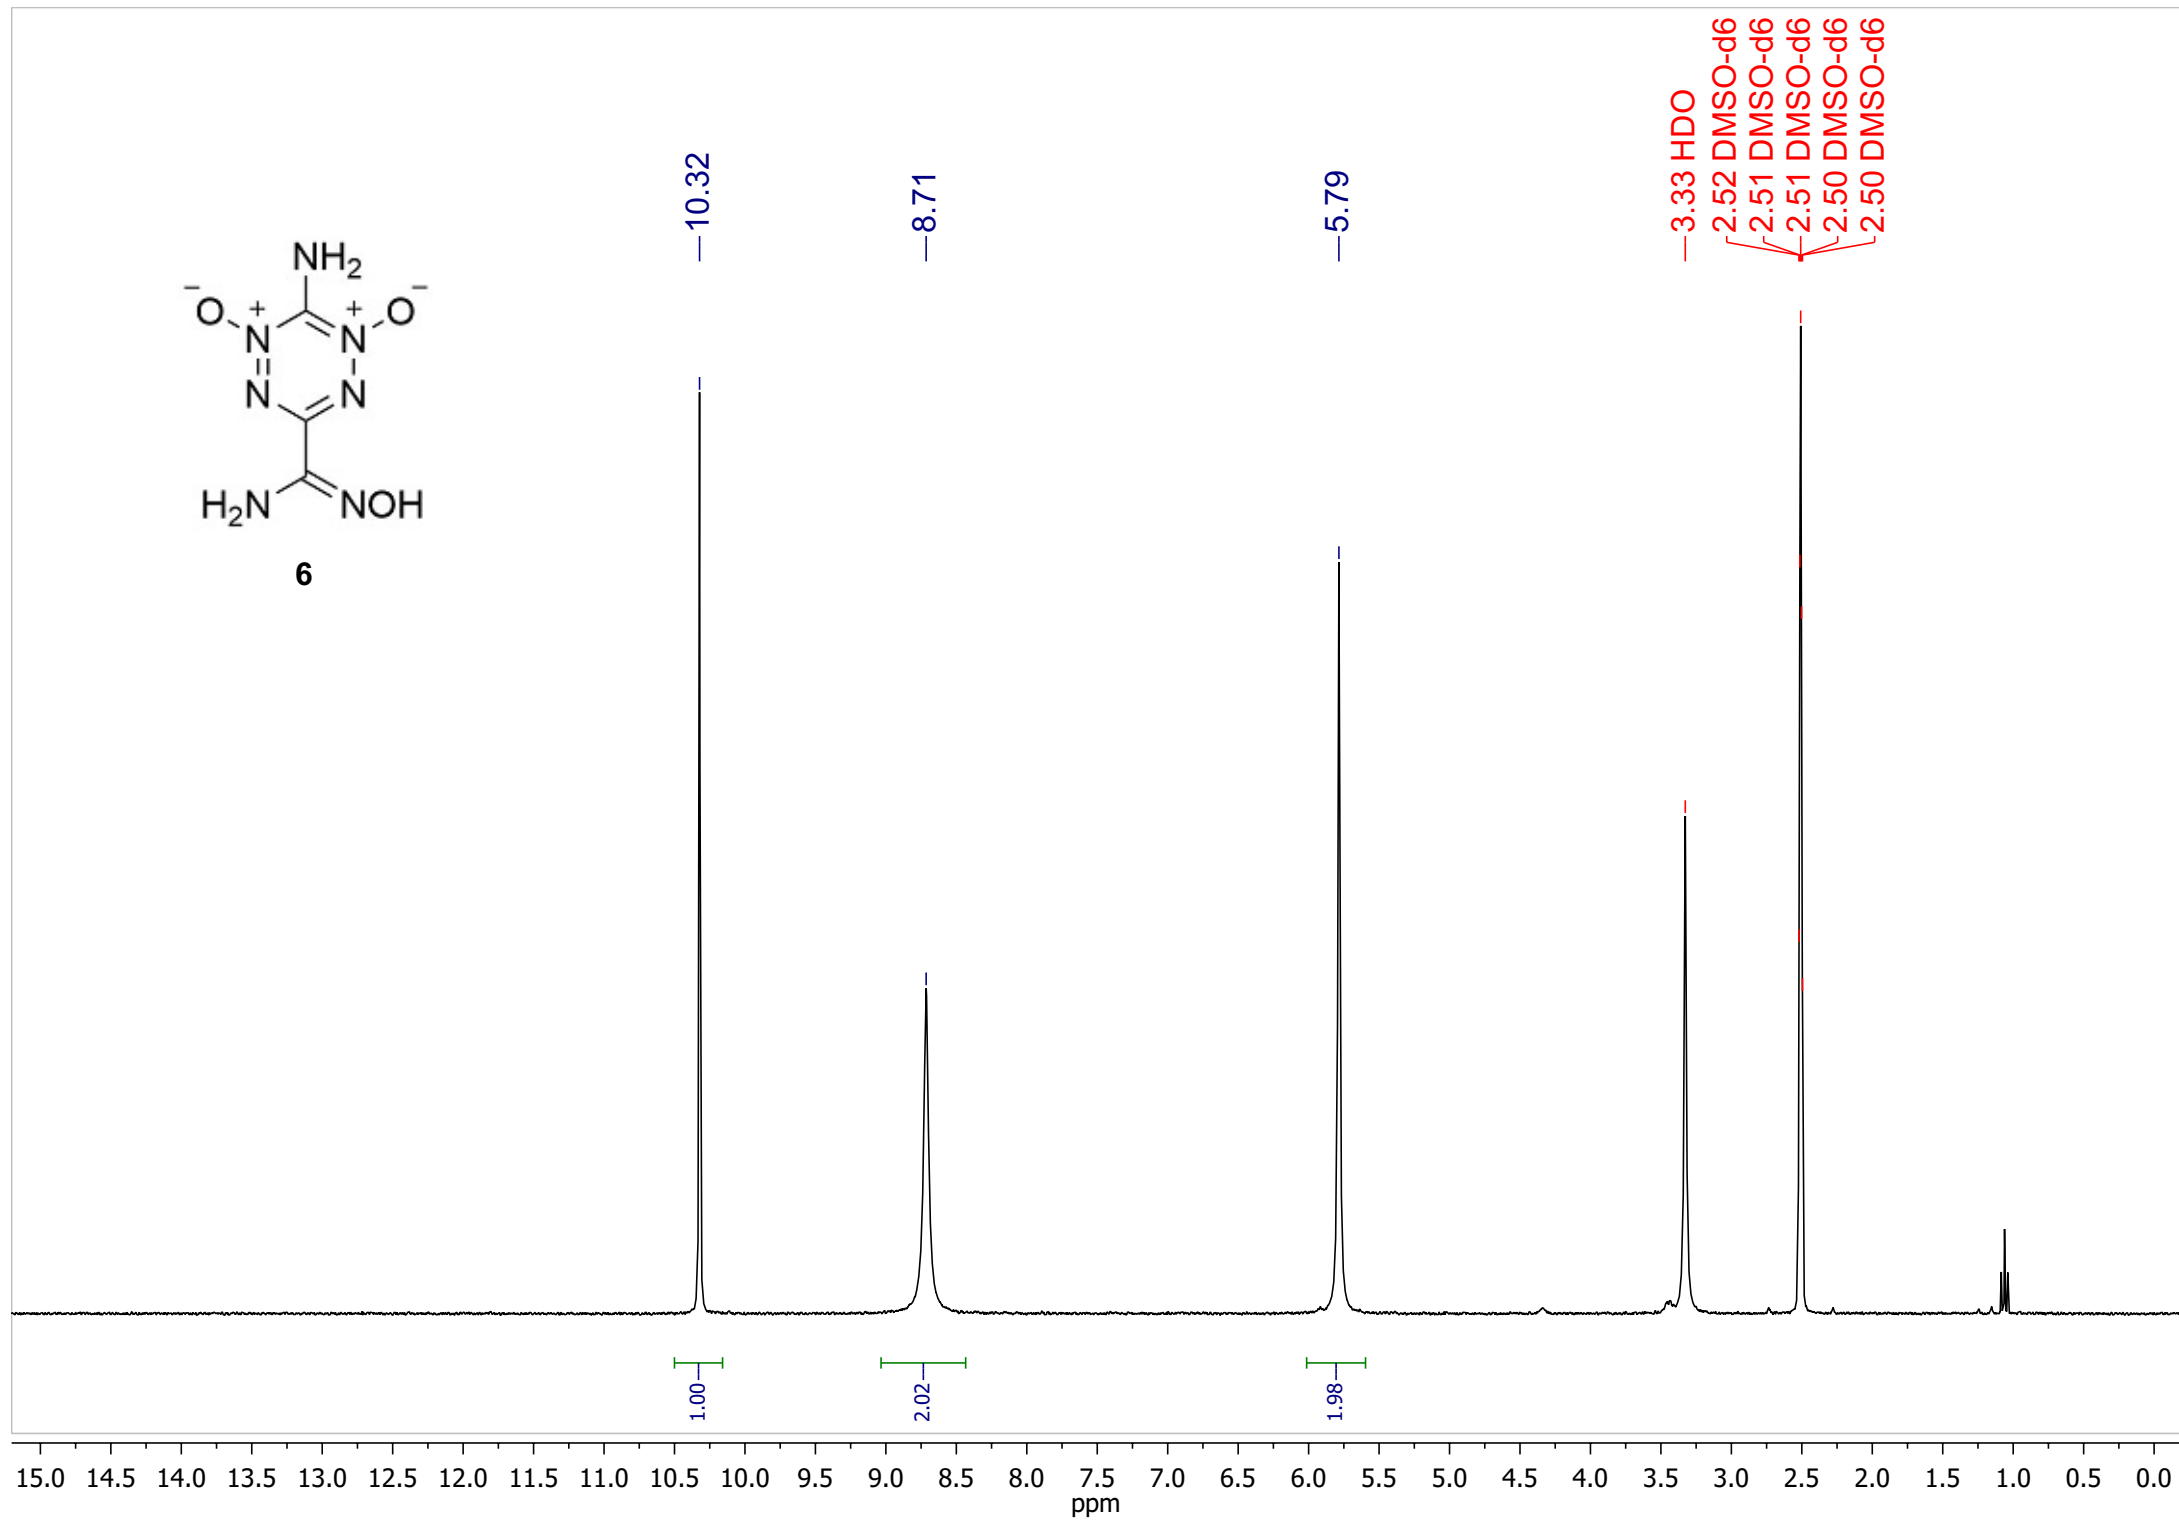

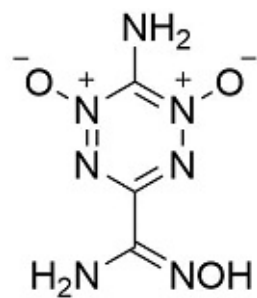

6

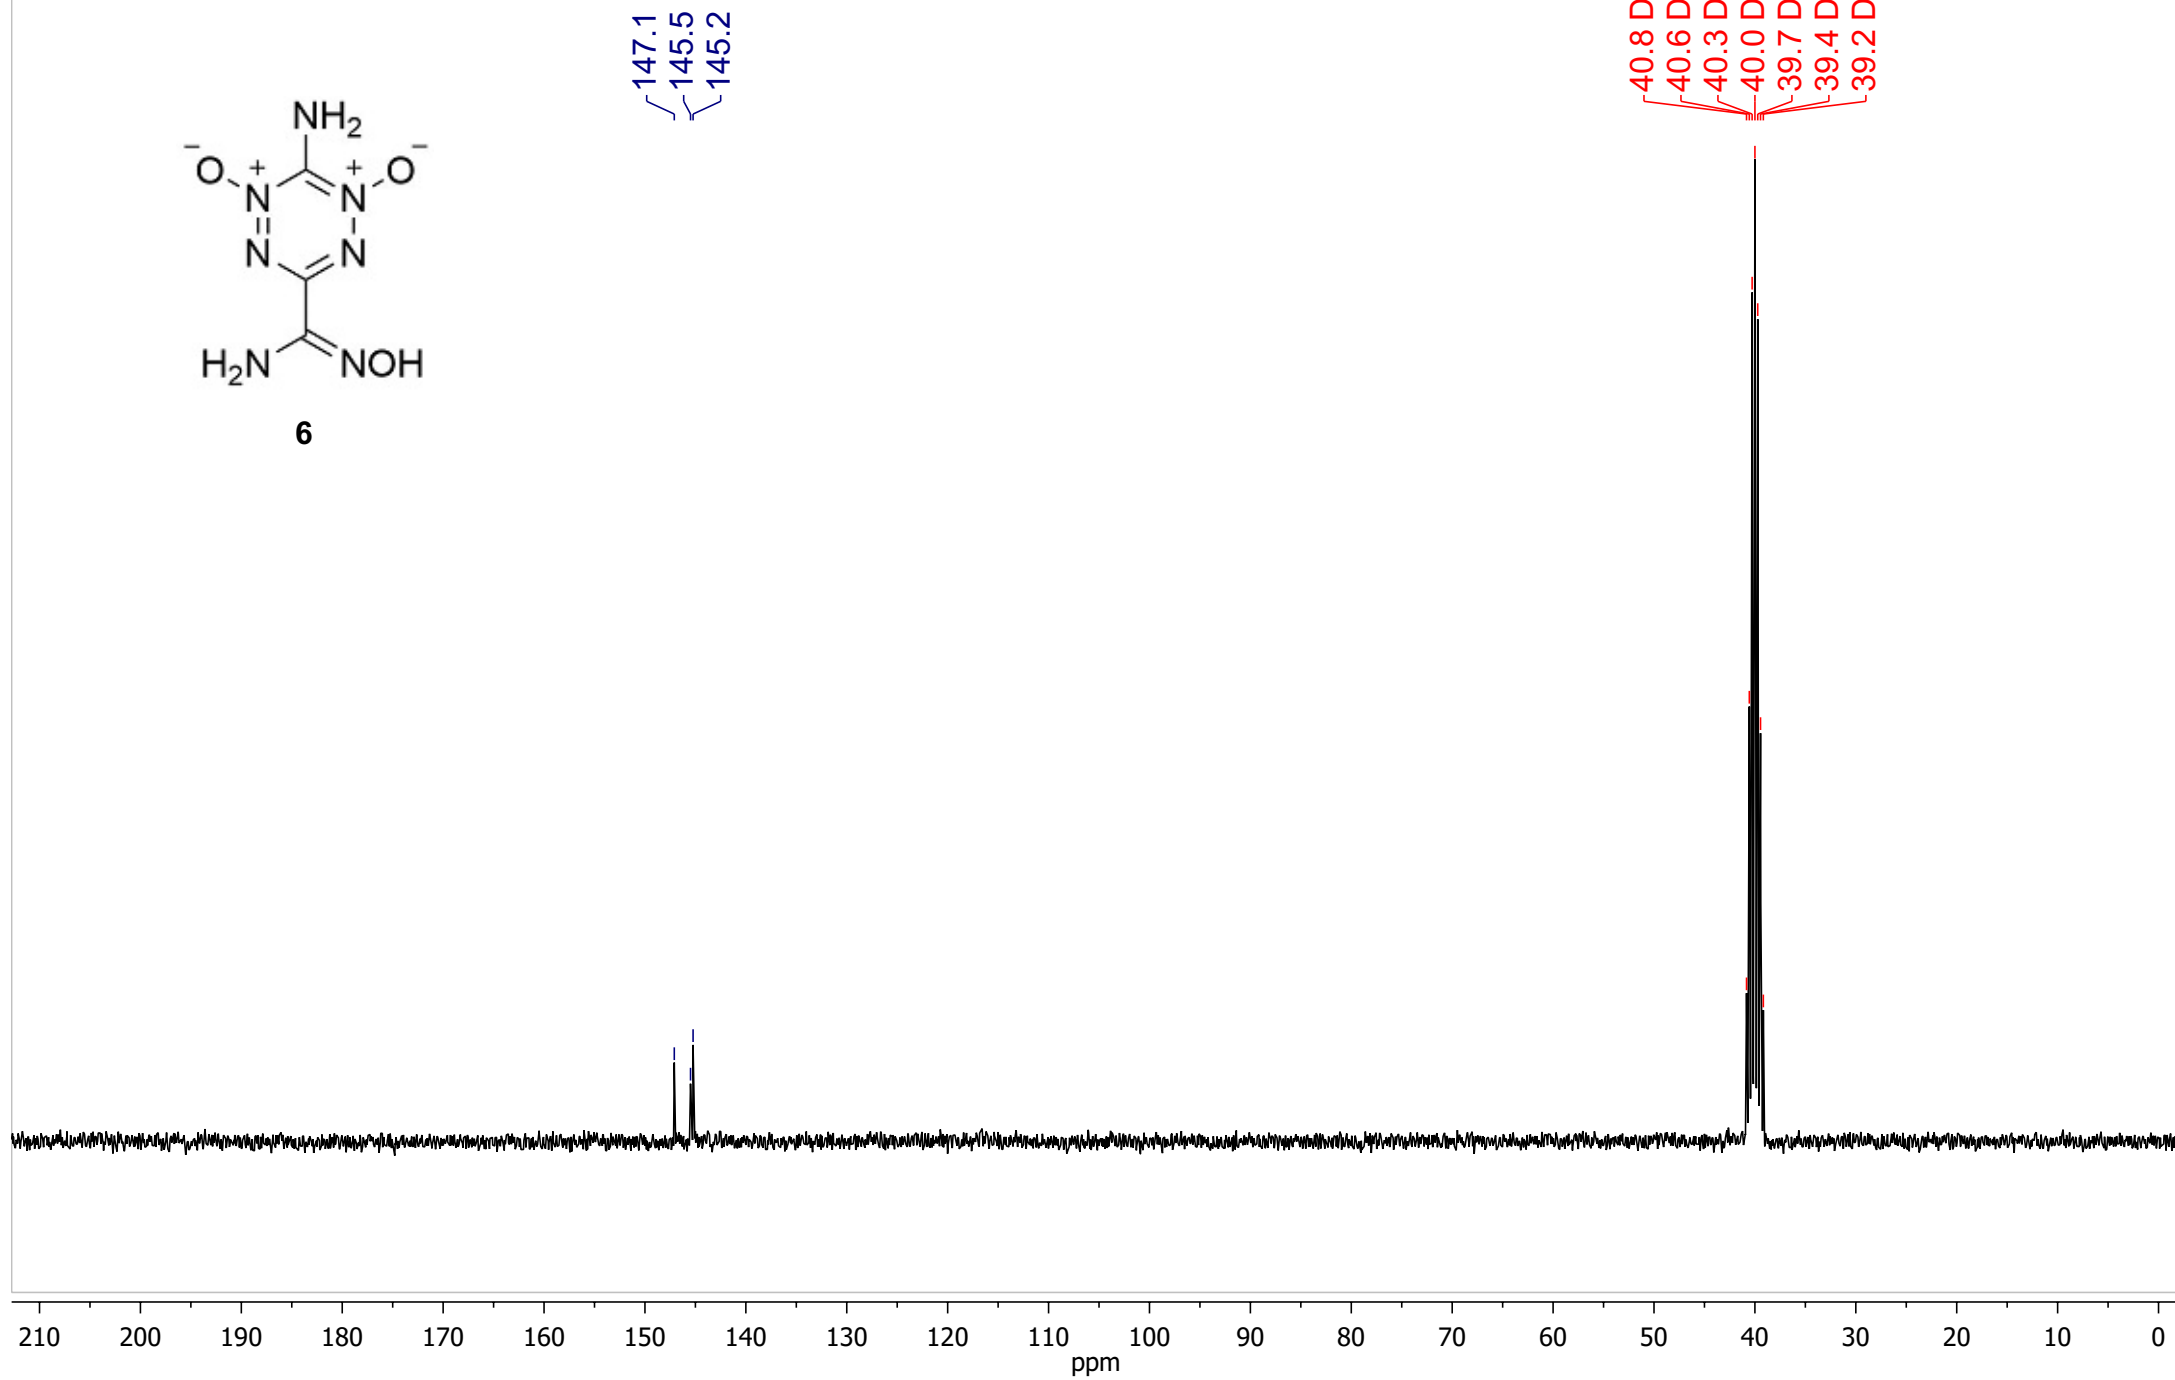

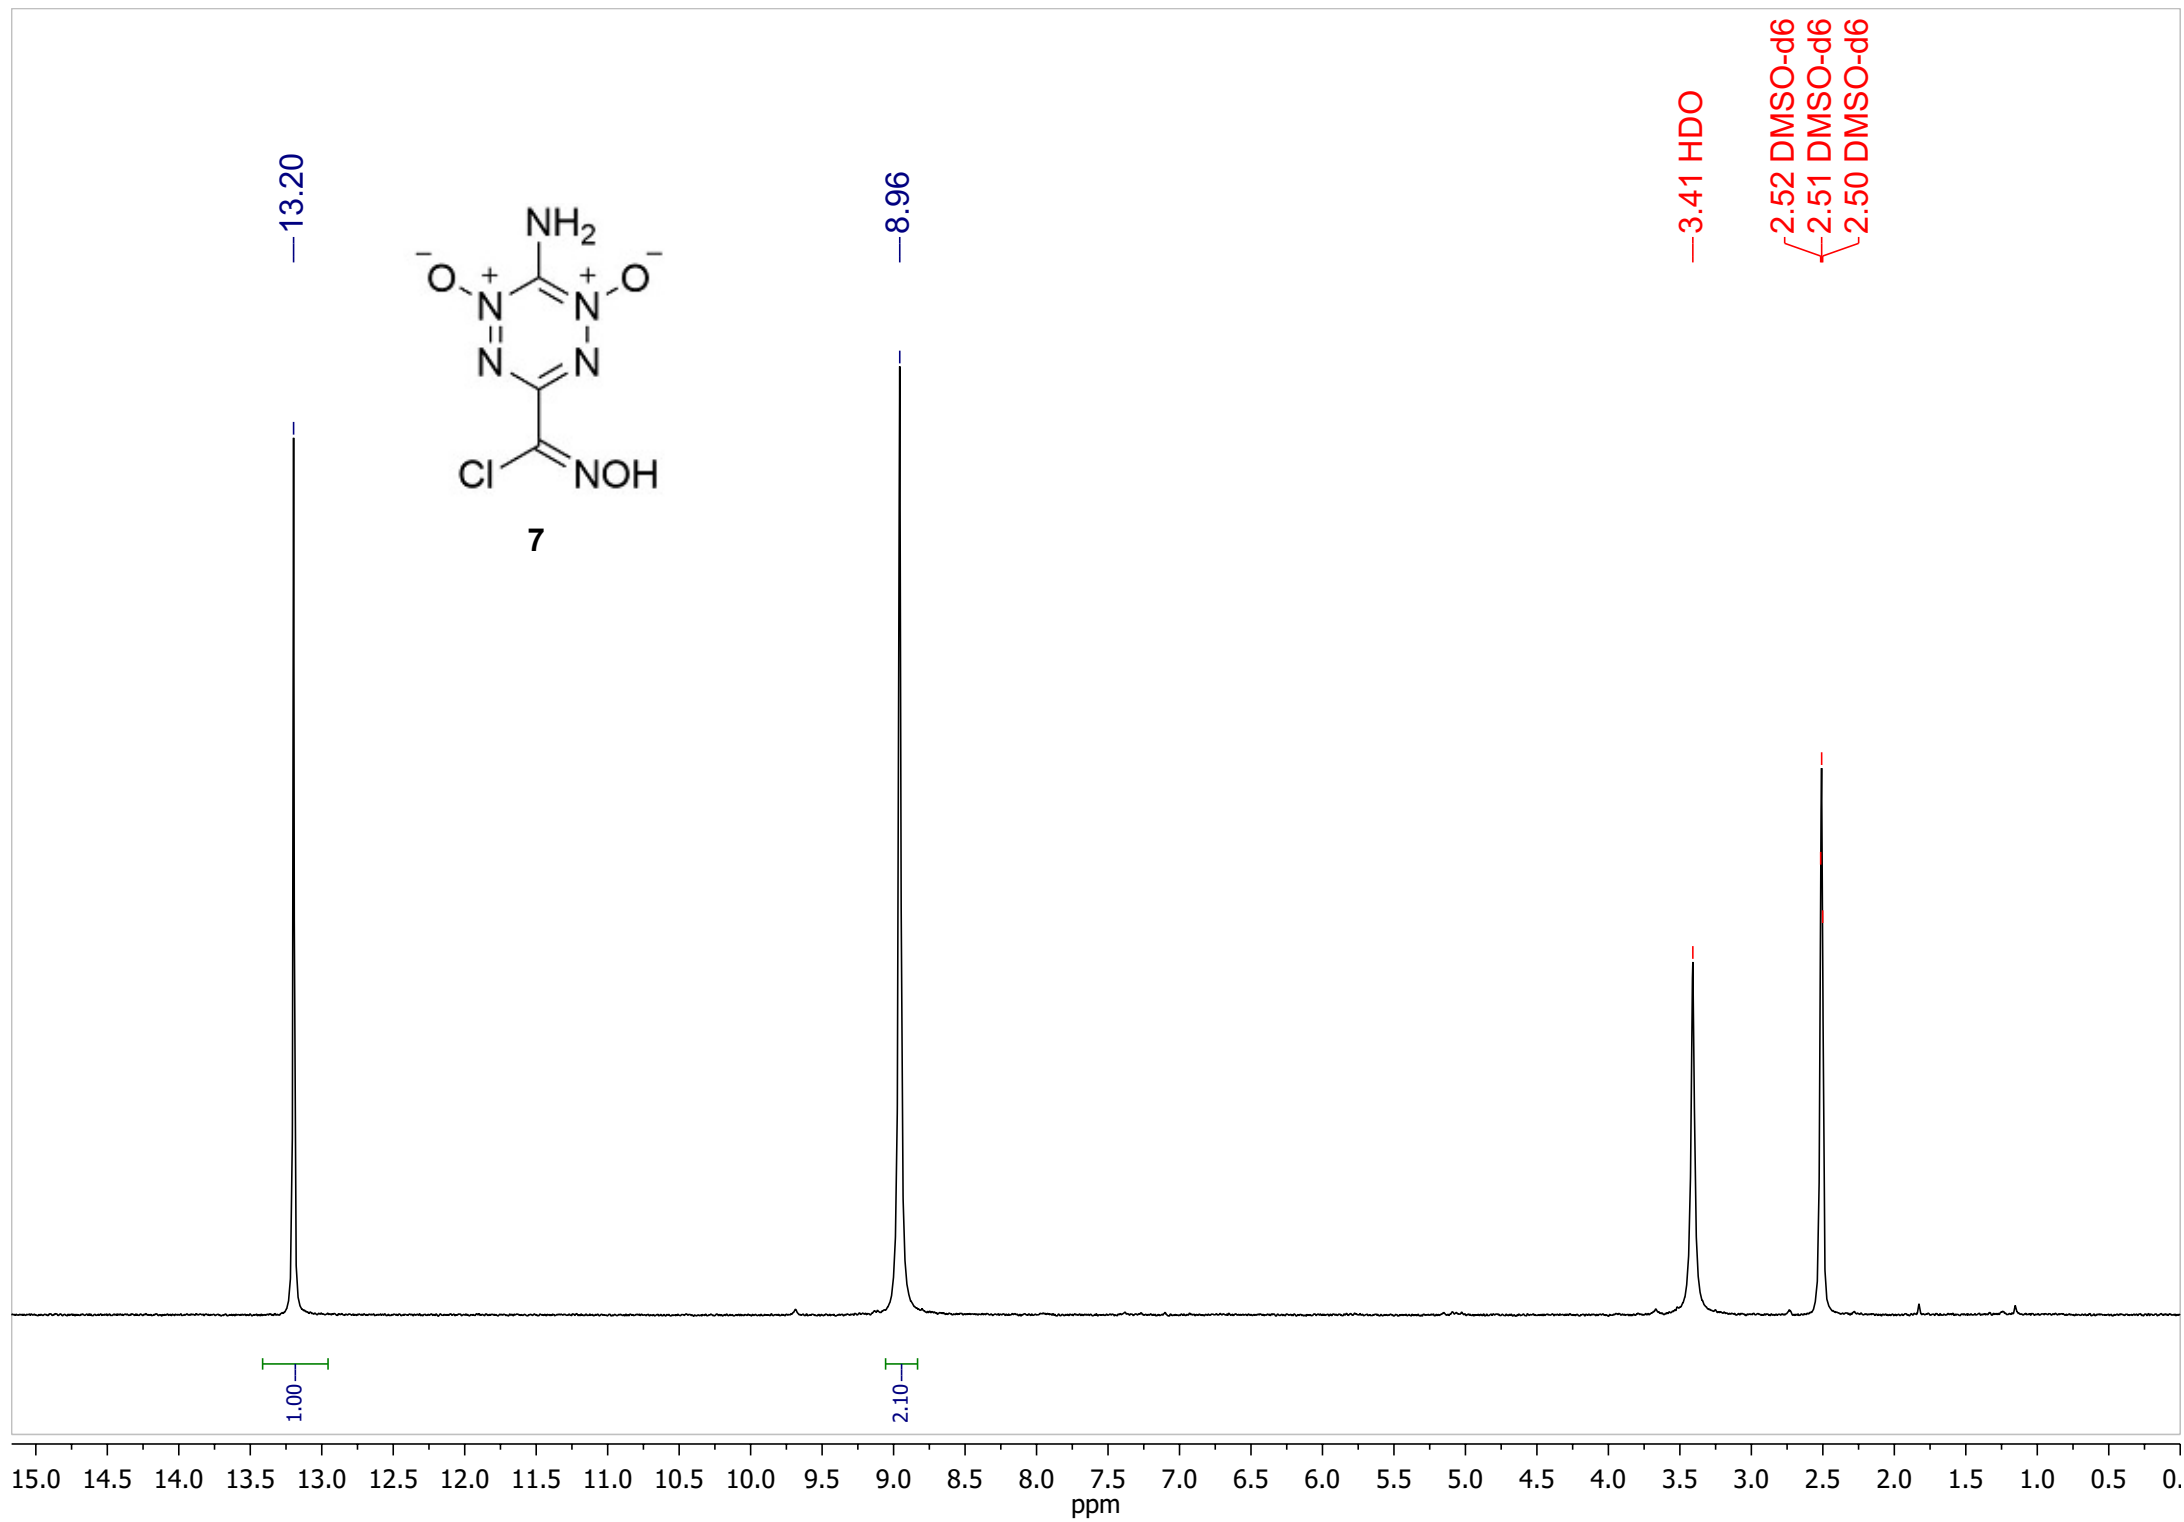



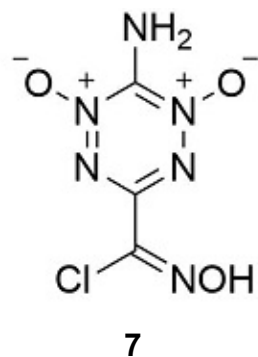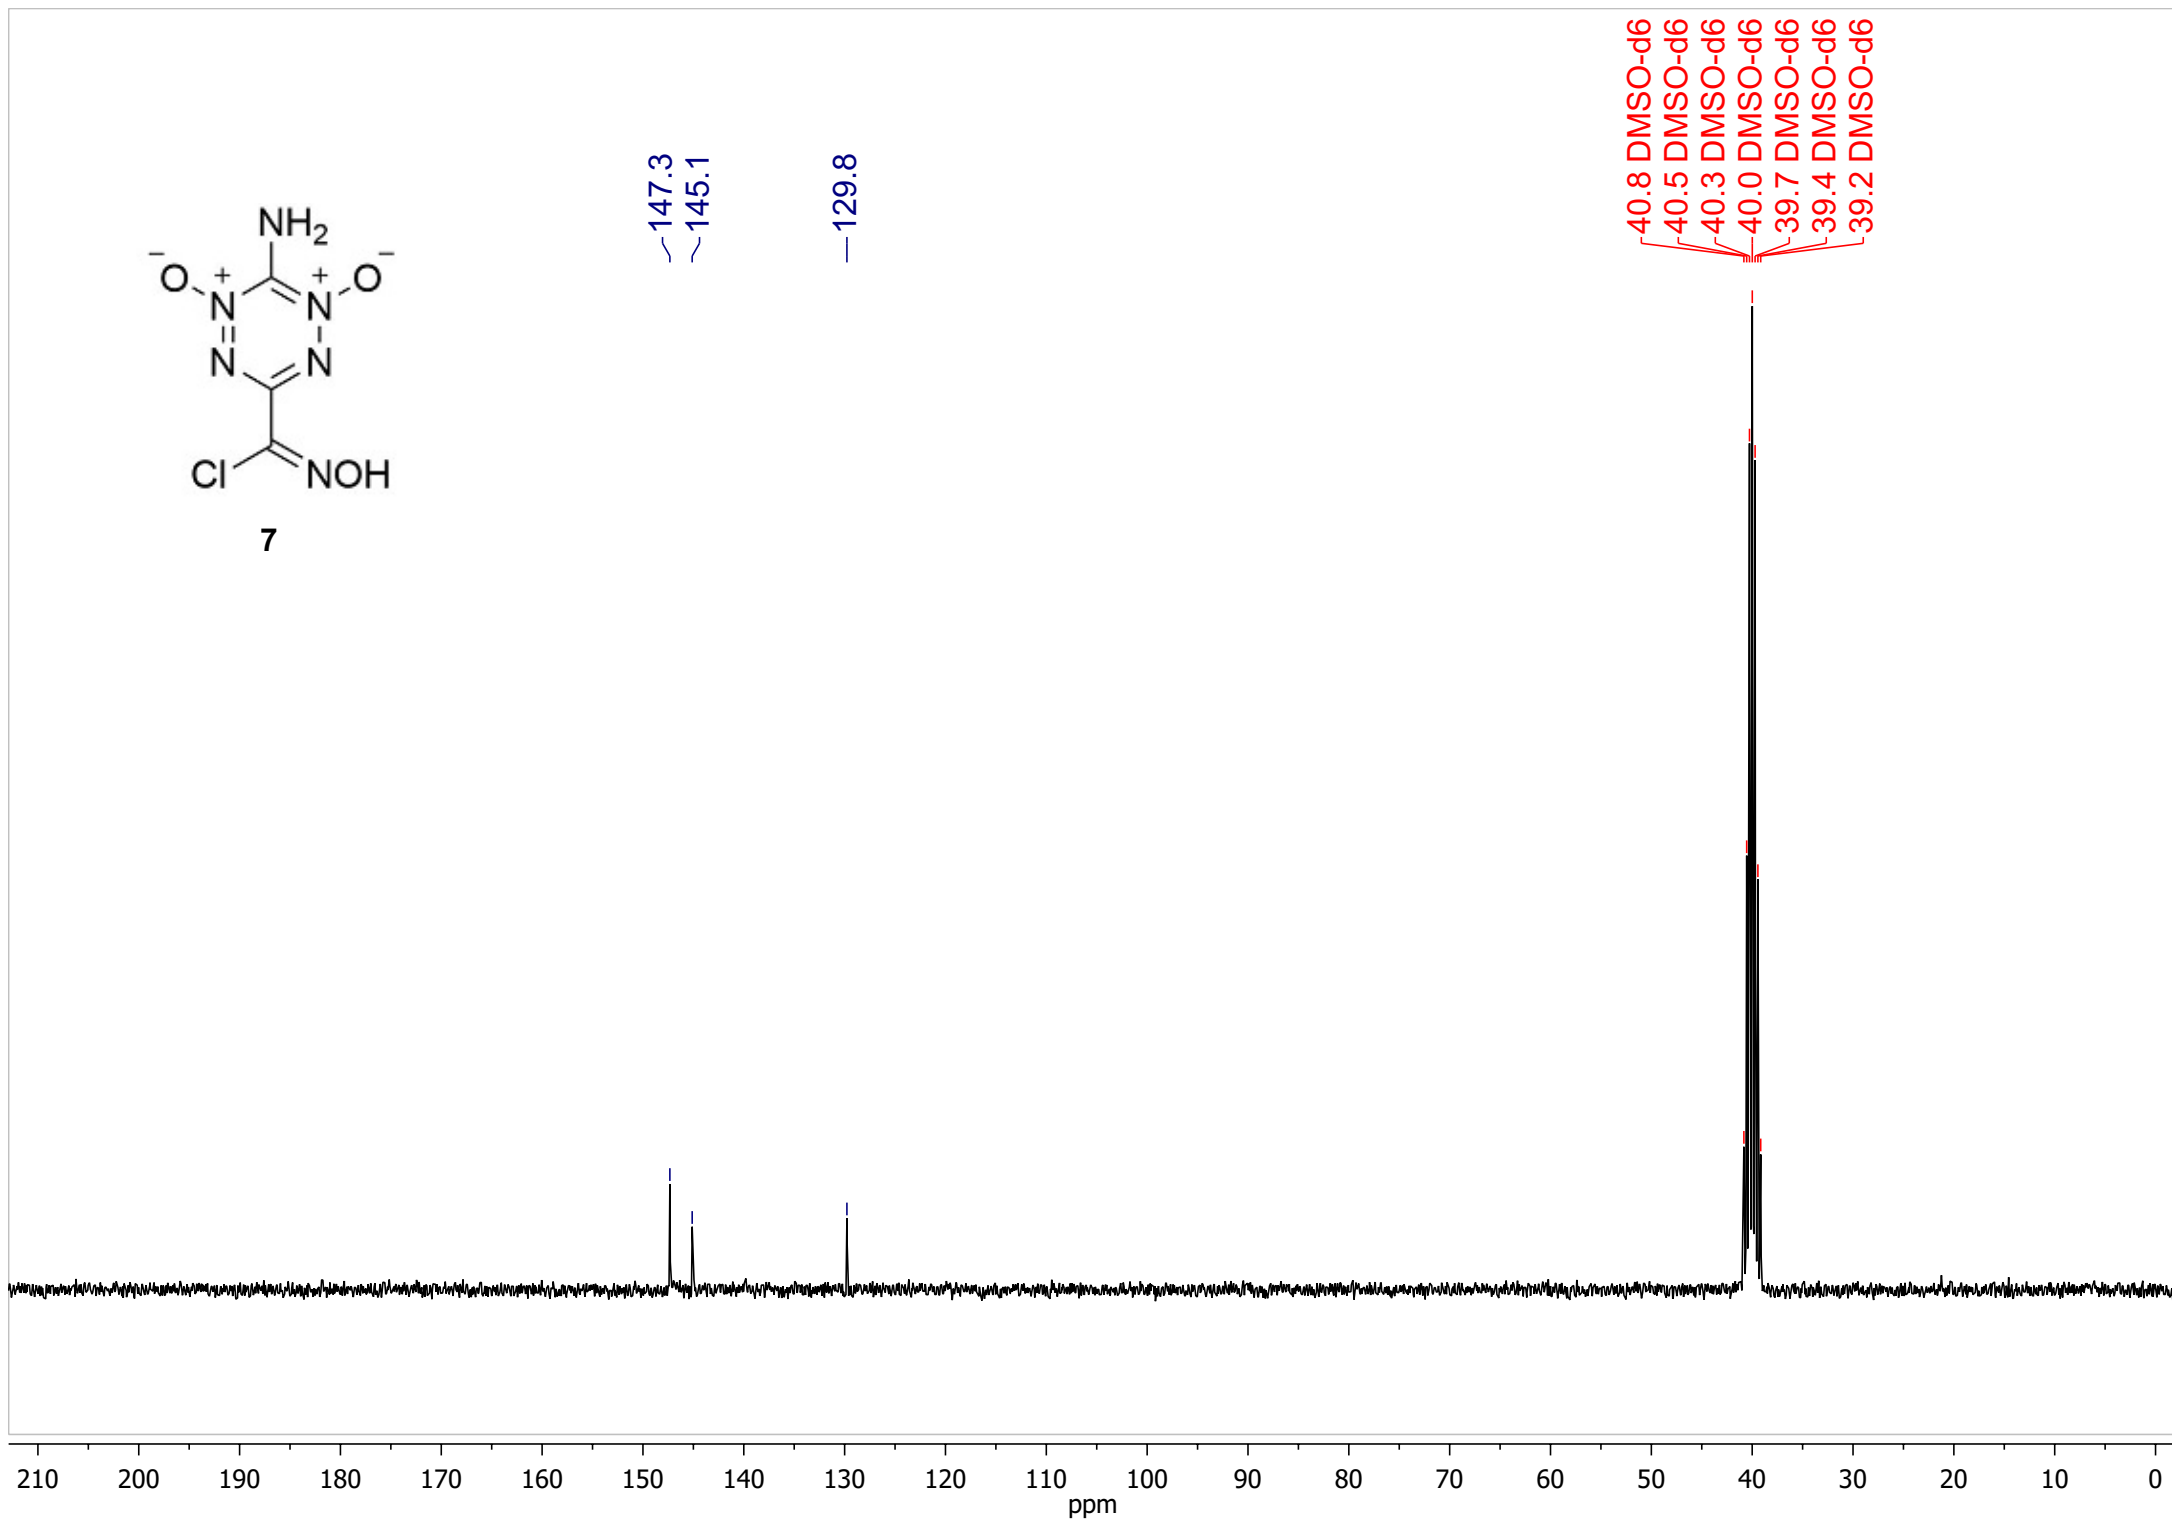

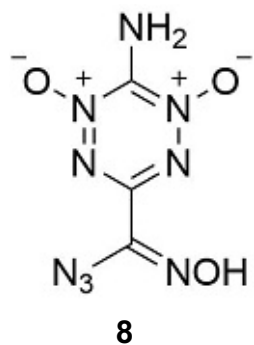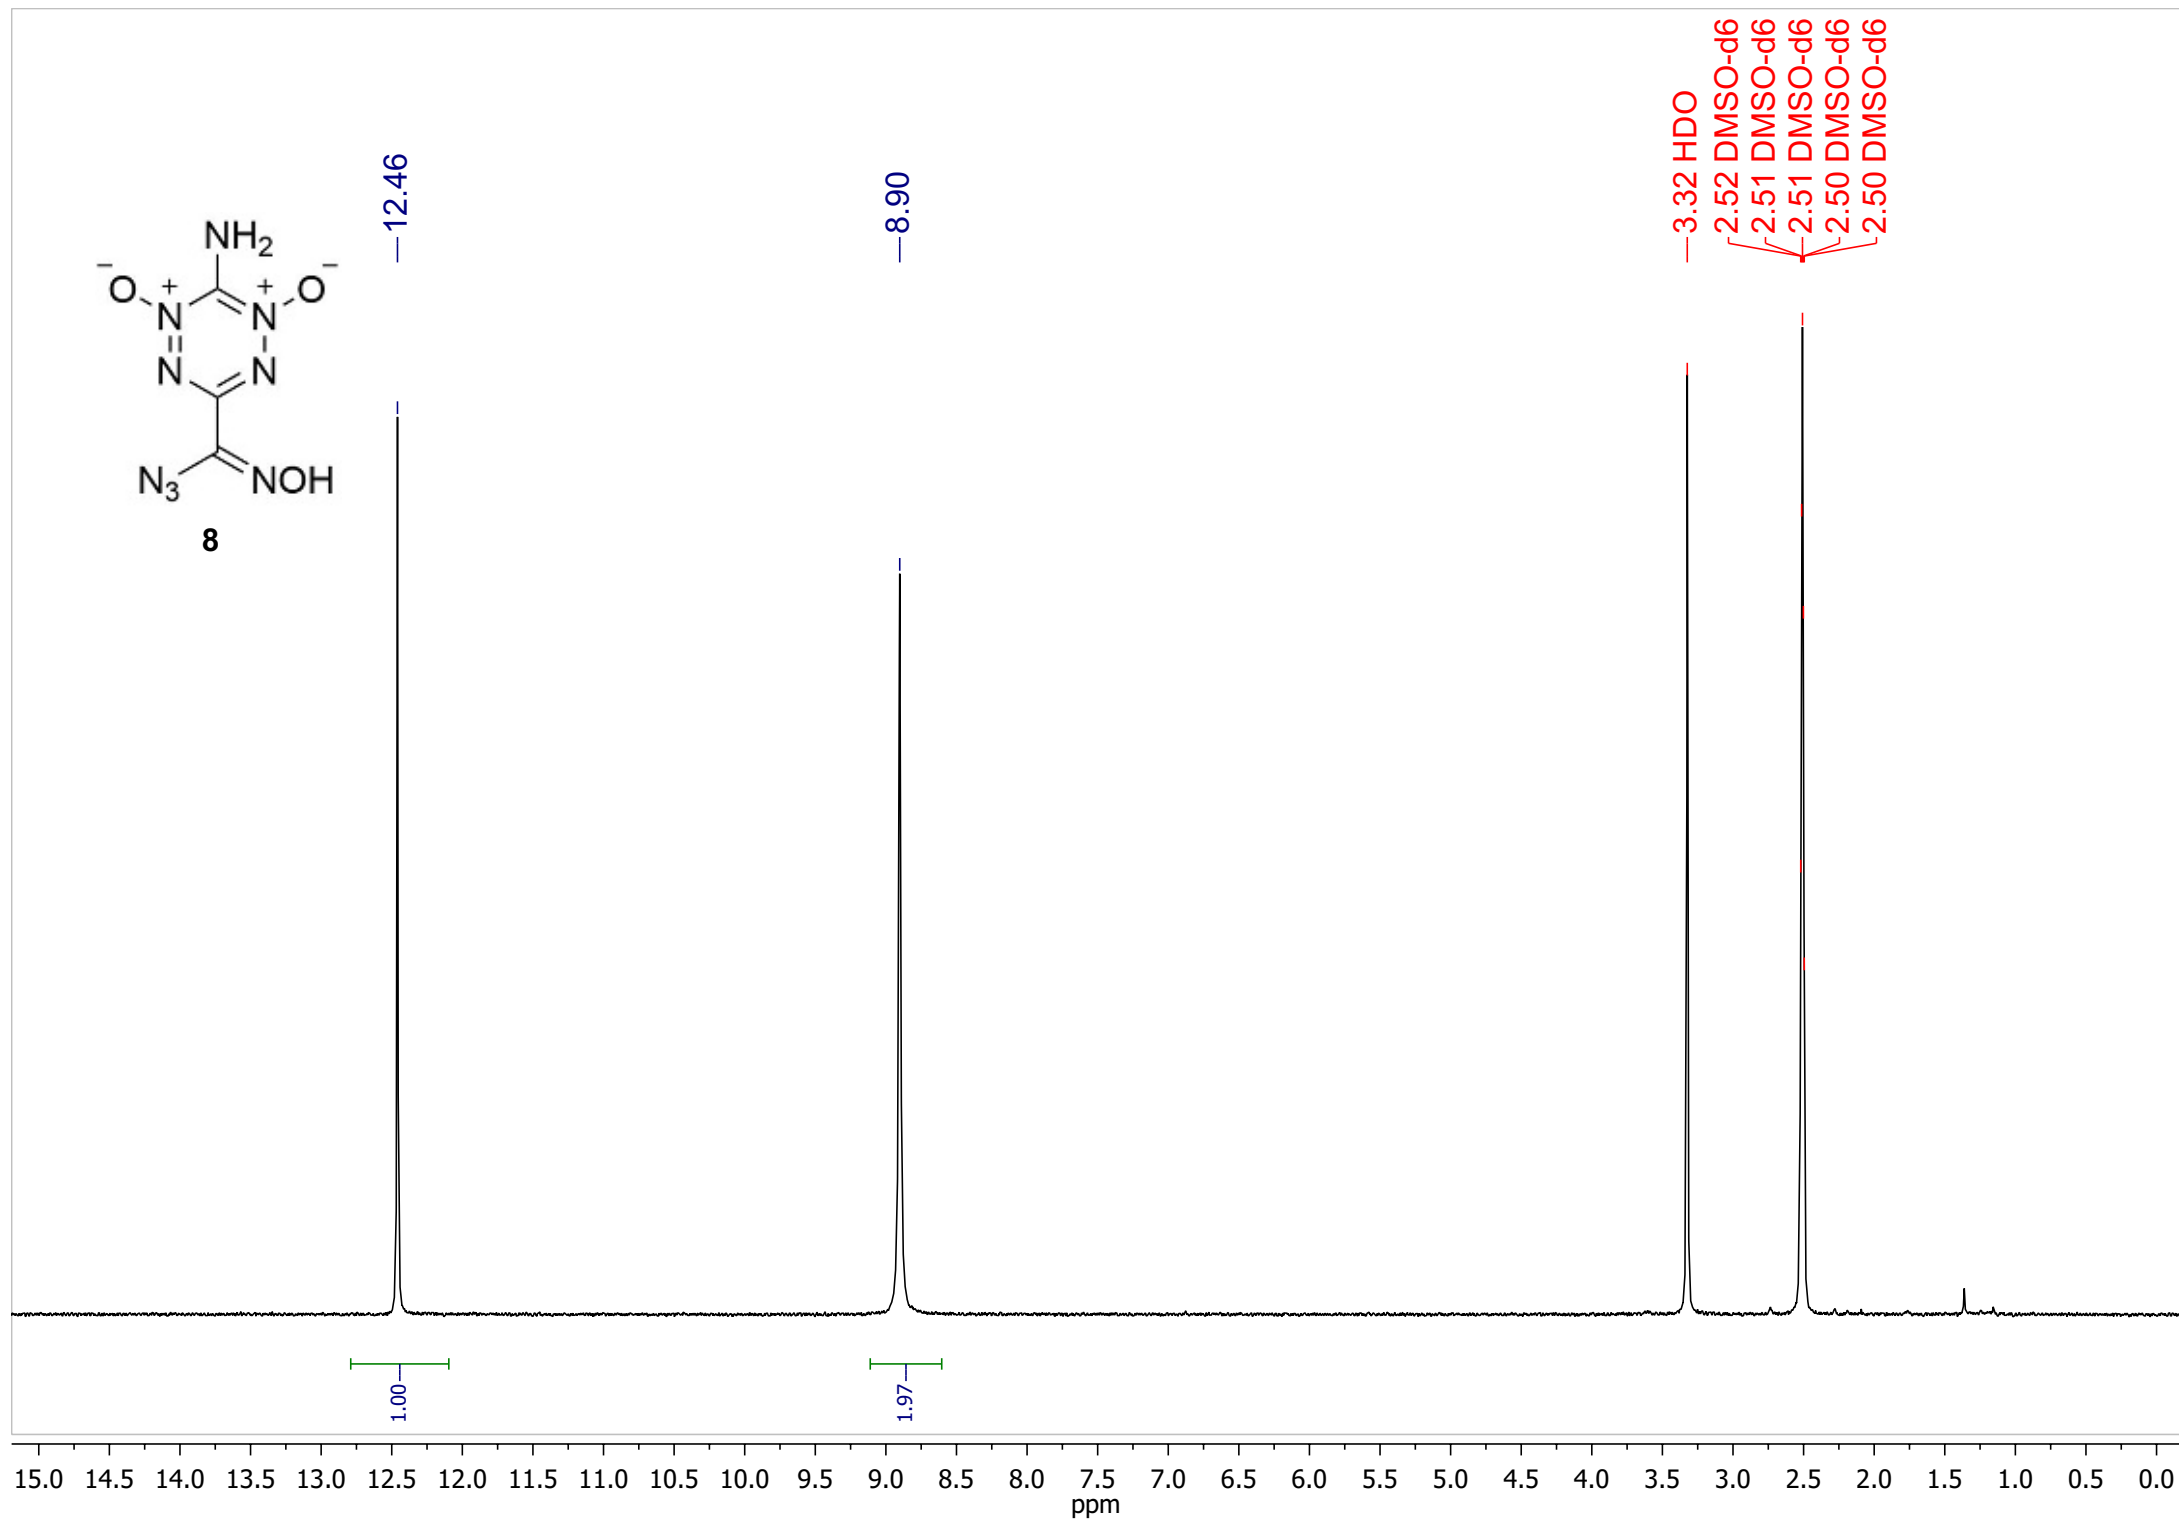

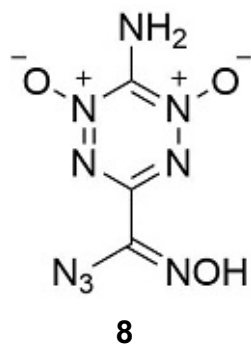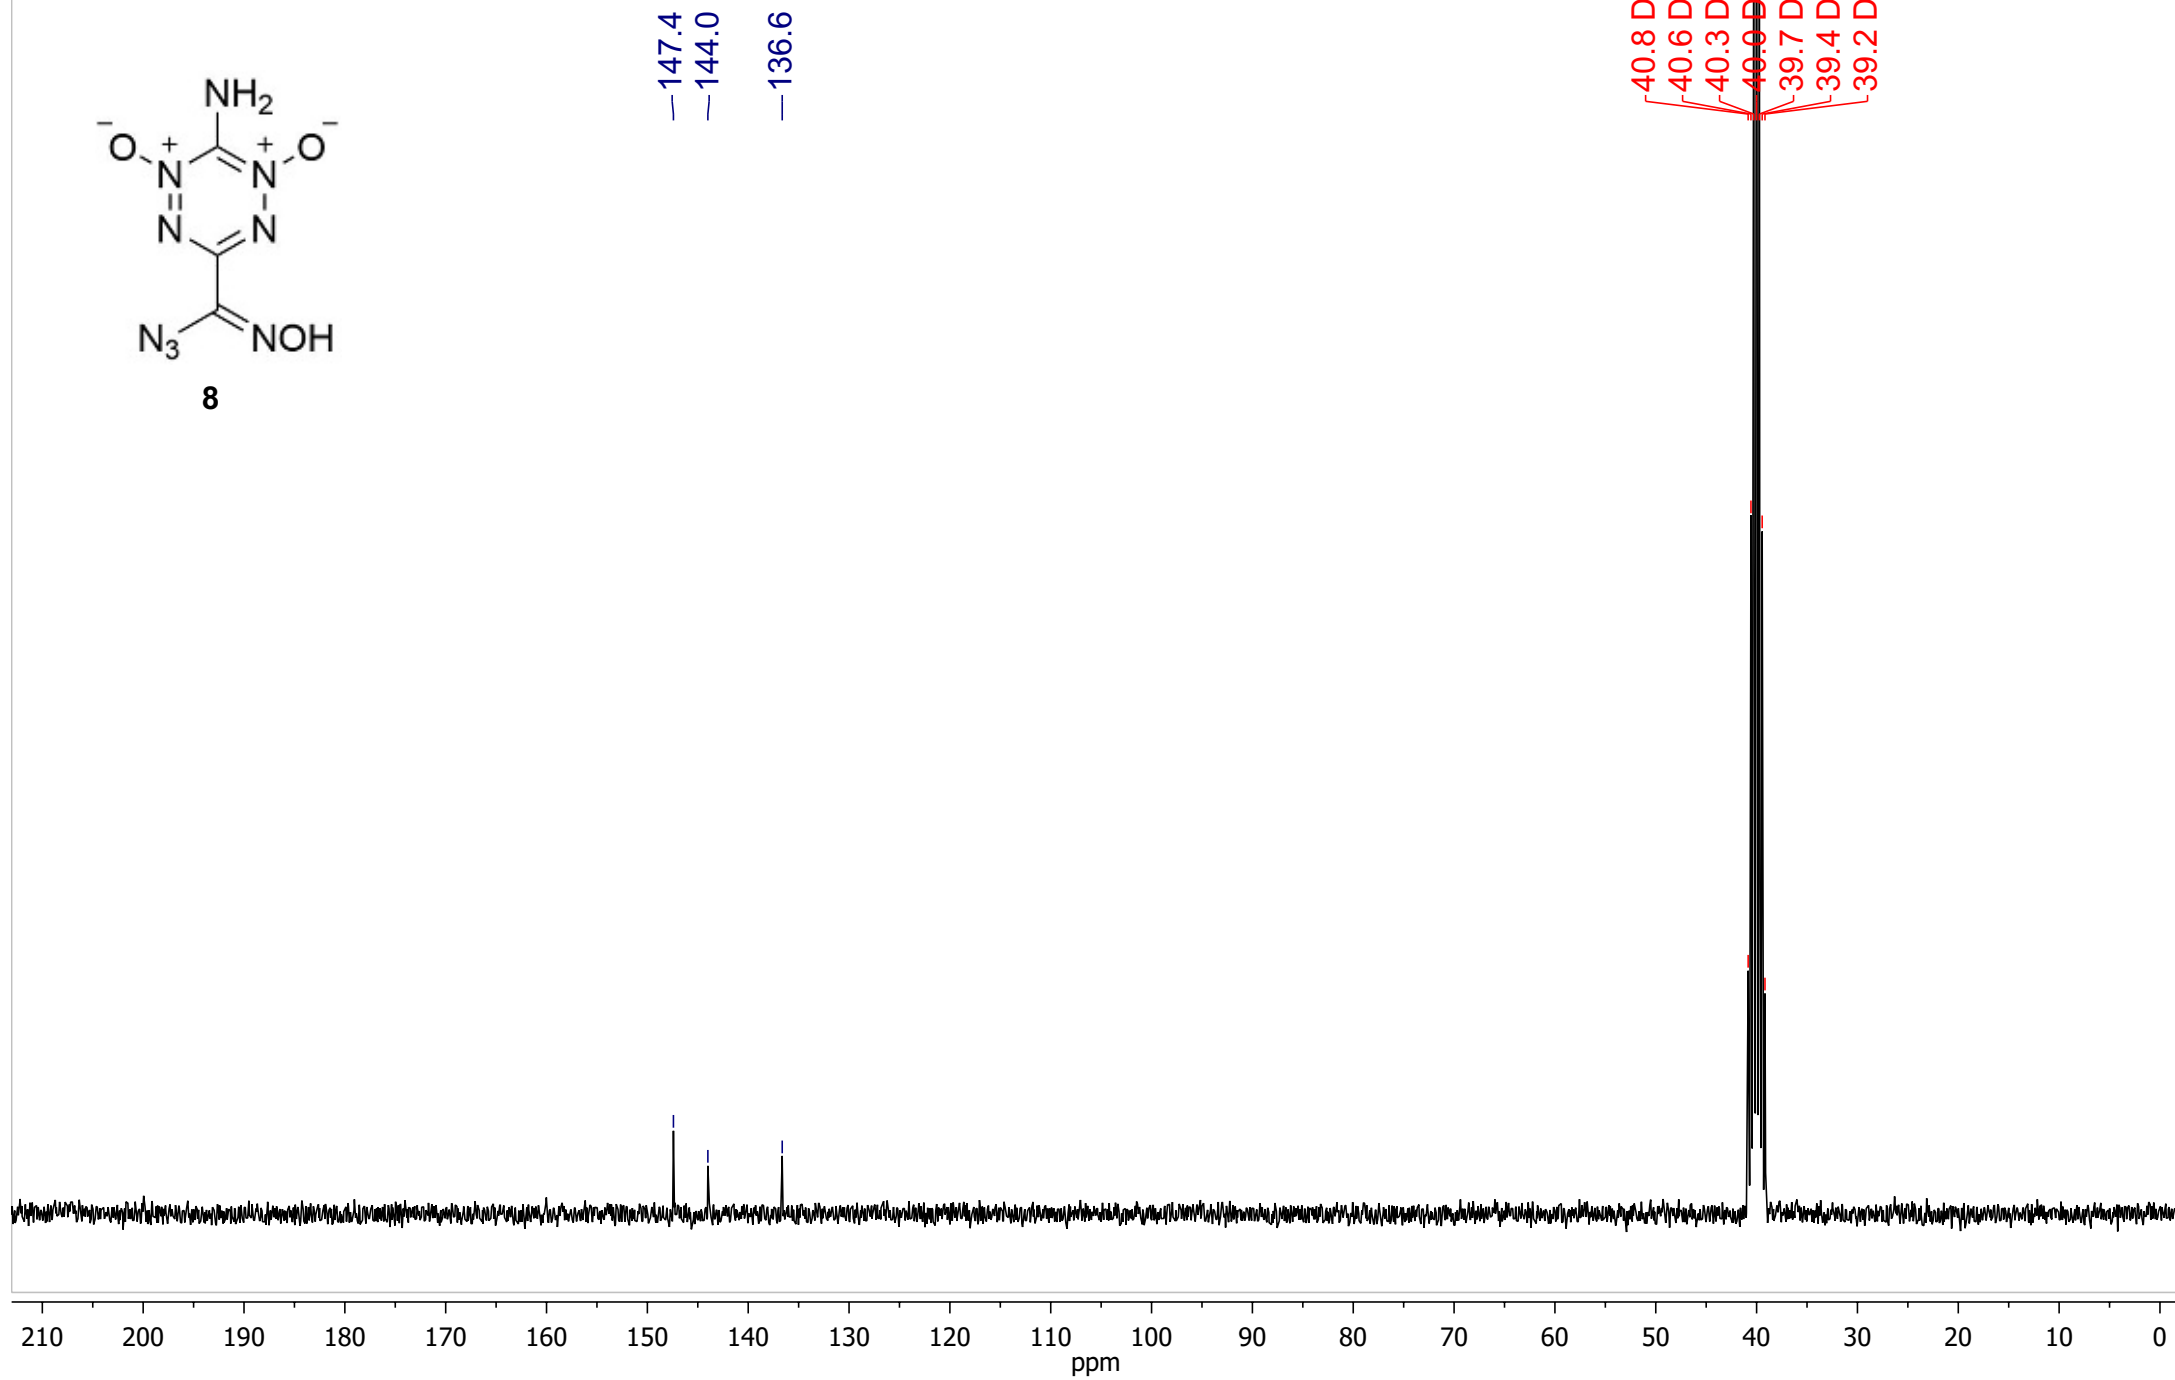

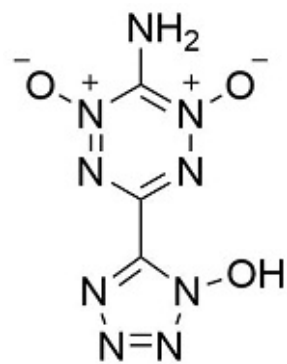

9

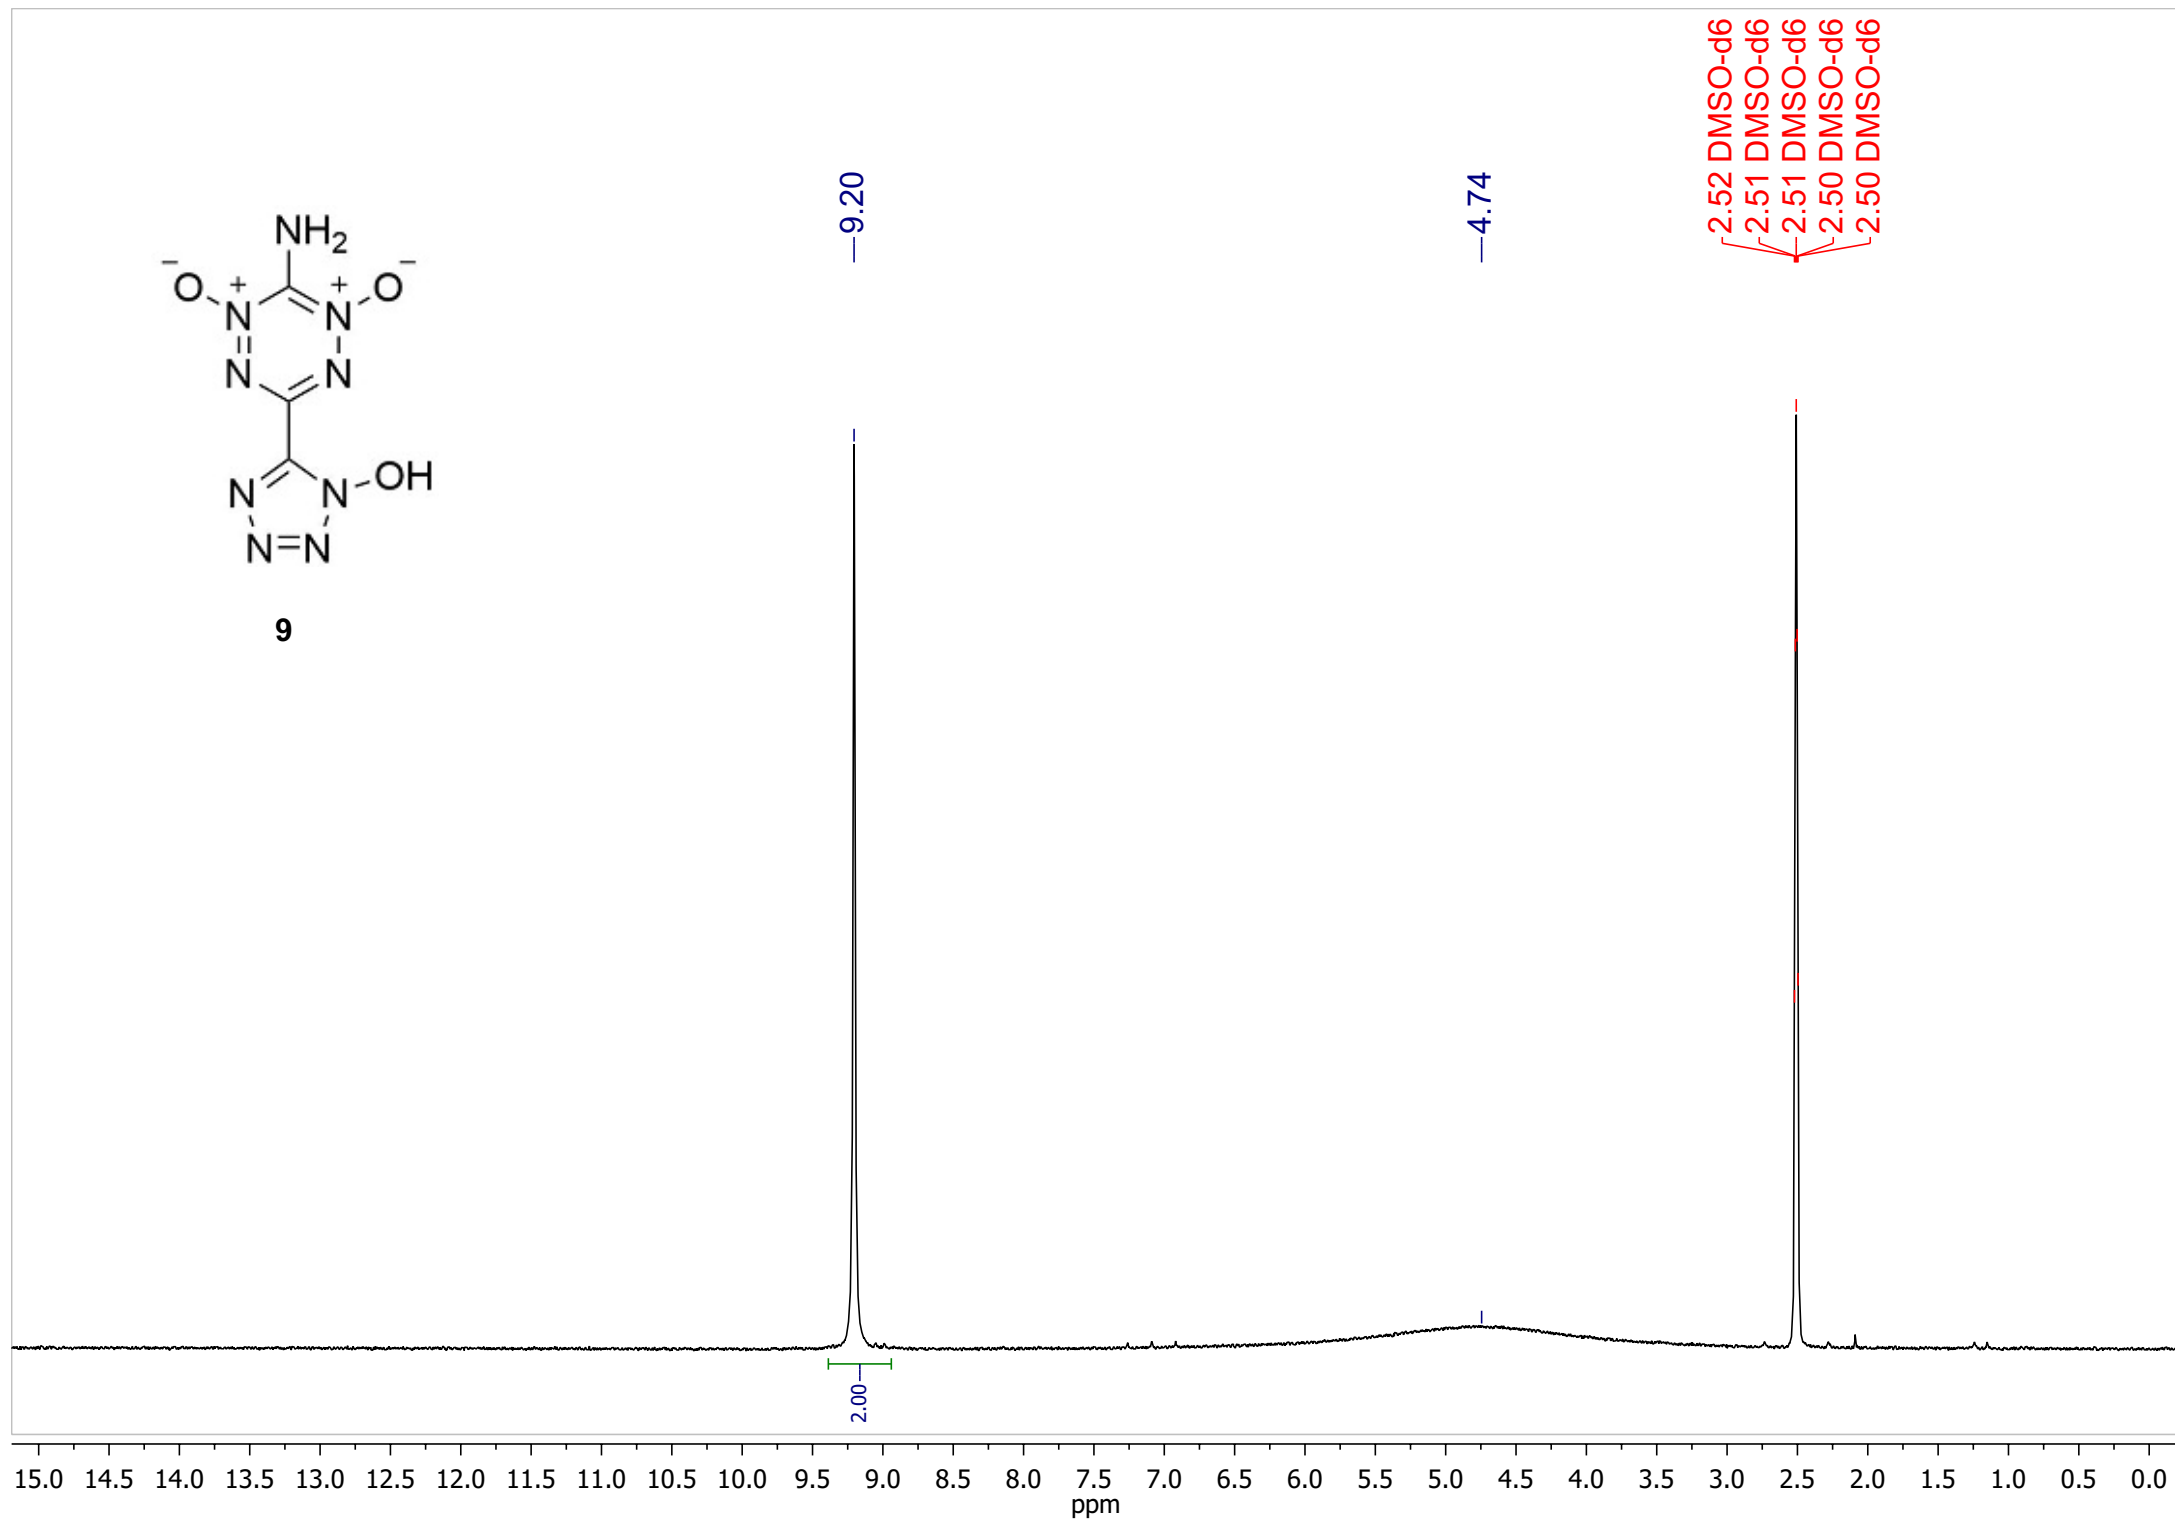



9

~148.0  
~141.5  
~139.6

40.8 DMSO-d6  
40.5 DMSO-d6  
40.3 DMSO-d6  
40.0 DMSO-d6  
39.7 DMSO-d6  
39.4 DMSO-d6  
39.2 DMSO-d6

210 200 190 180 170 160 150 140 130 120 110 100 90 80 70 60 50 40 30 20 10 0

ppm

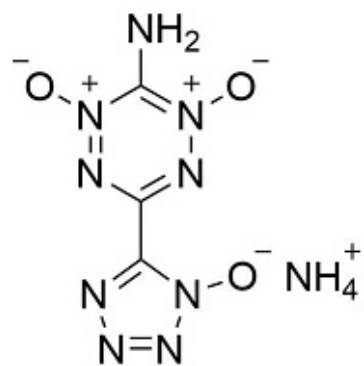

10

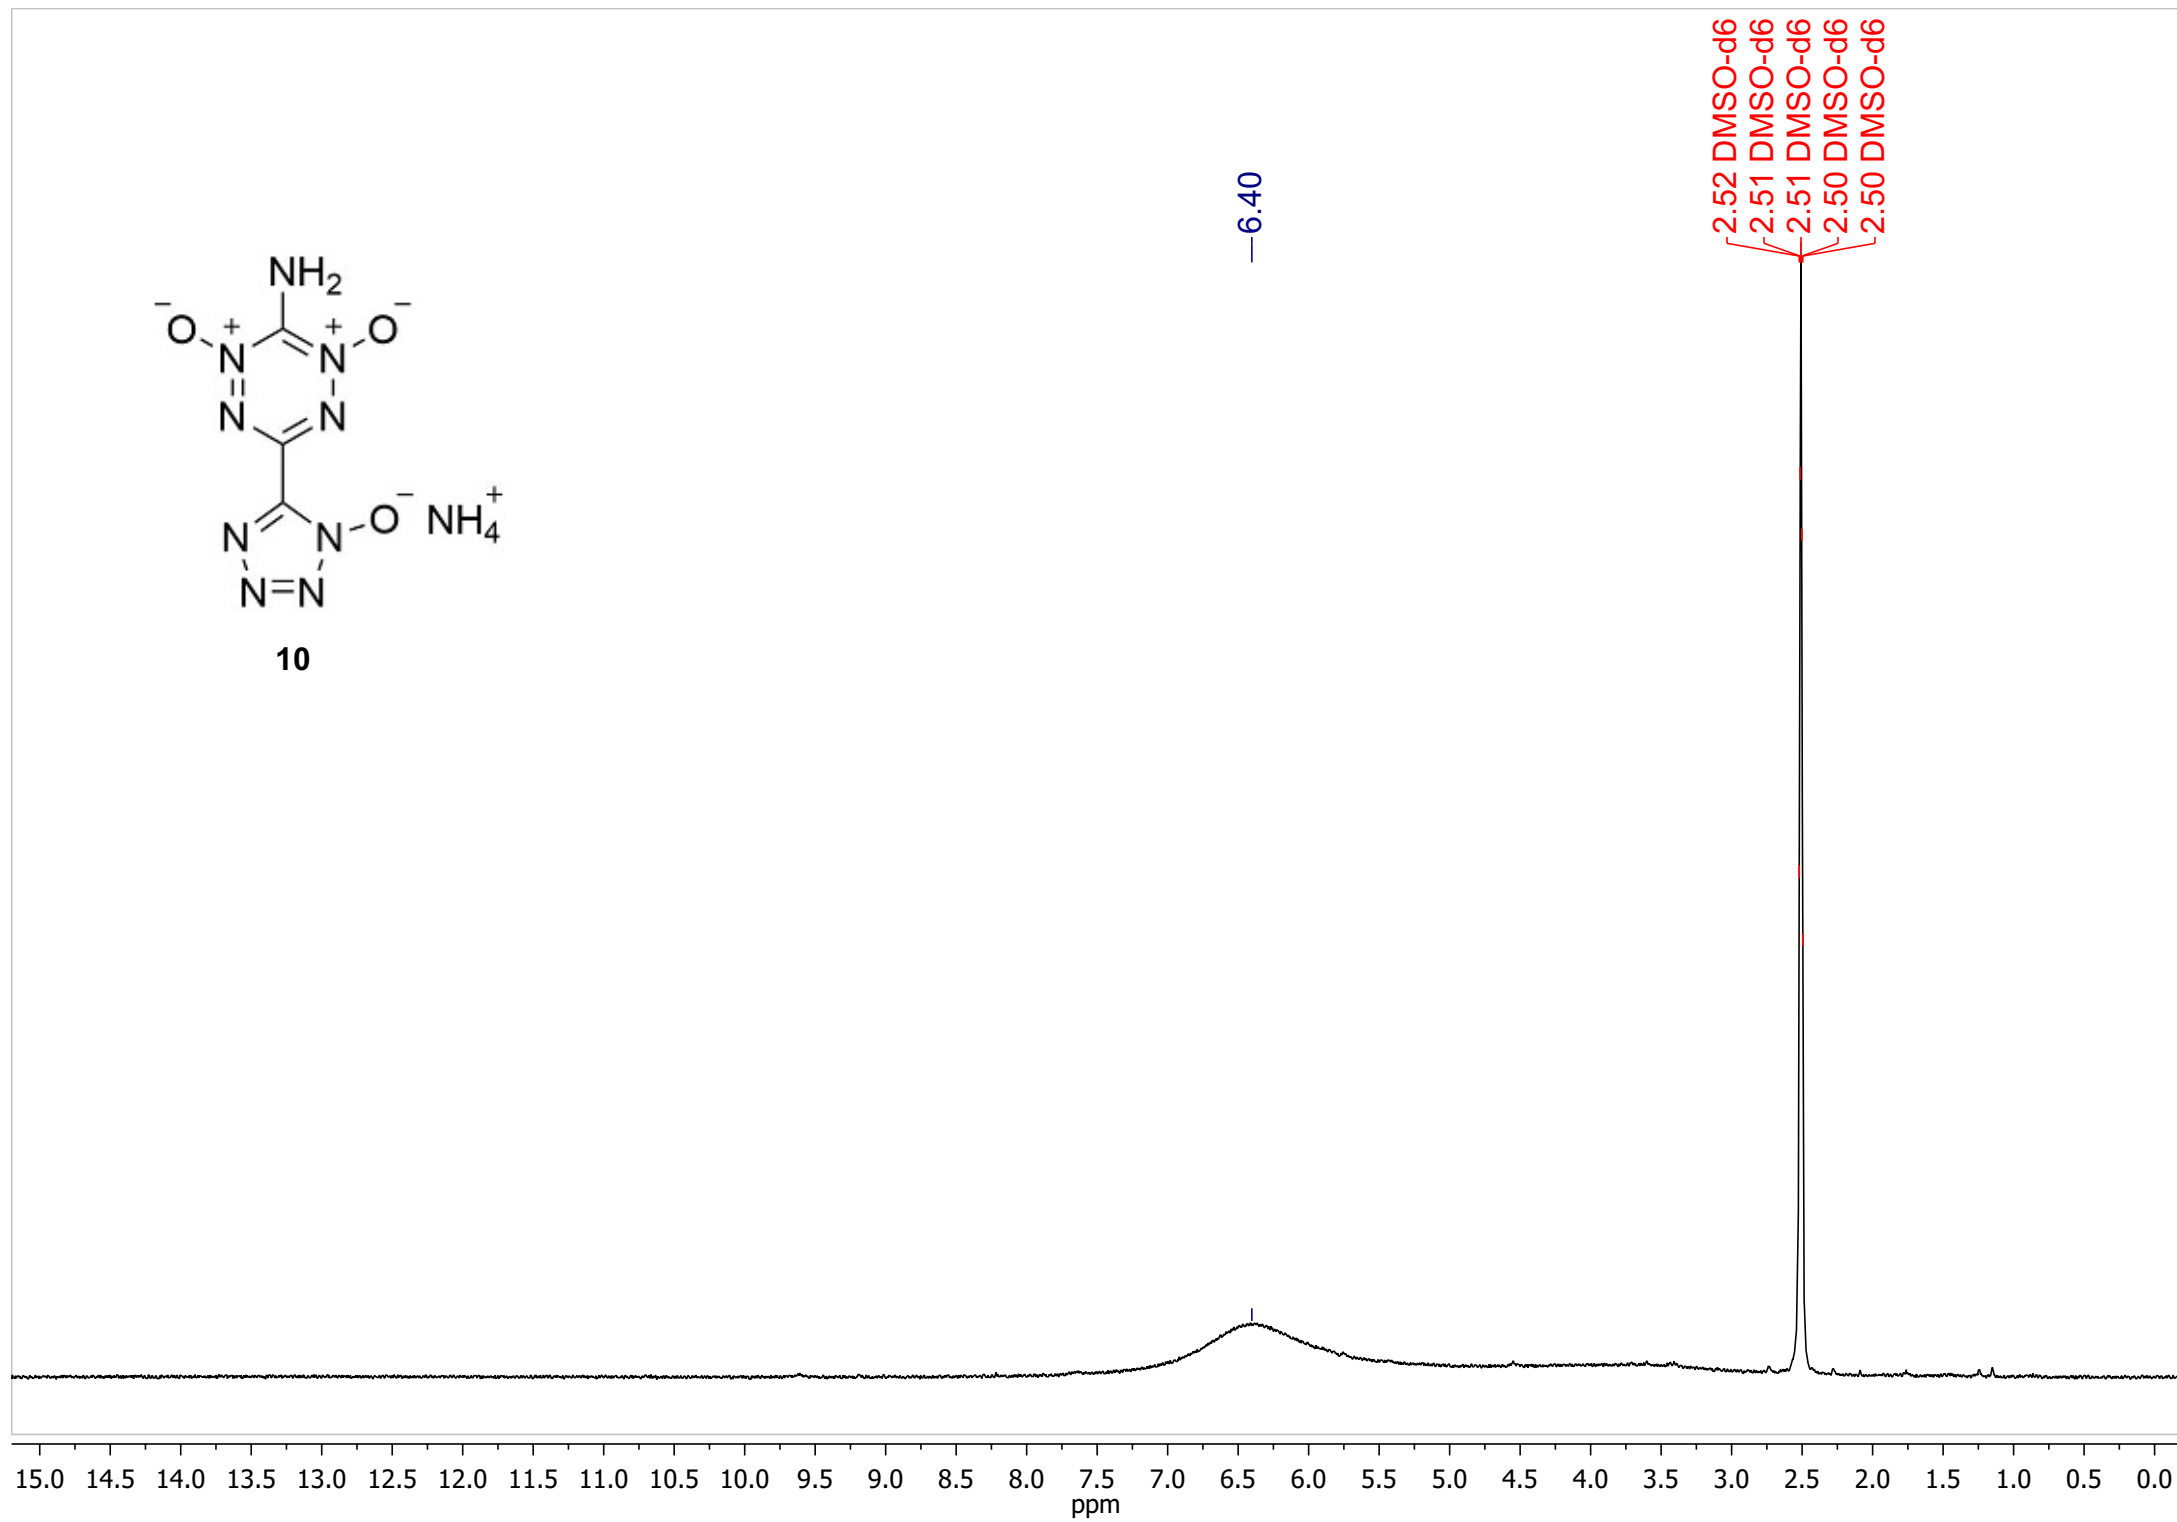

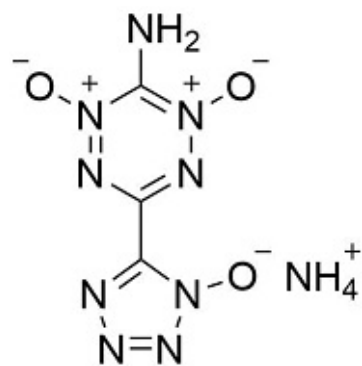

10

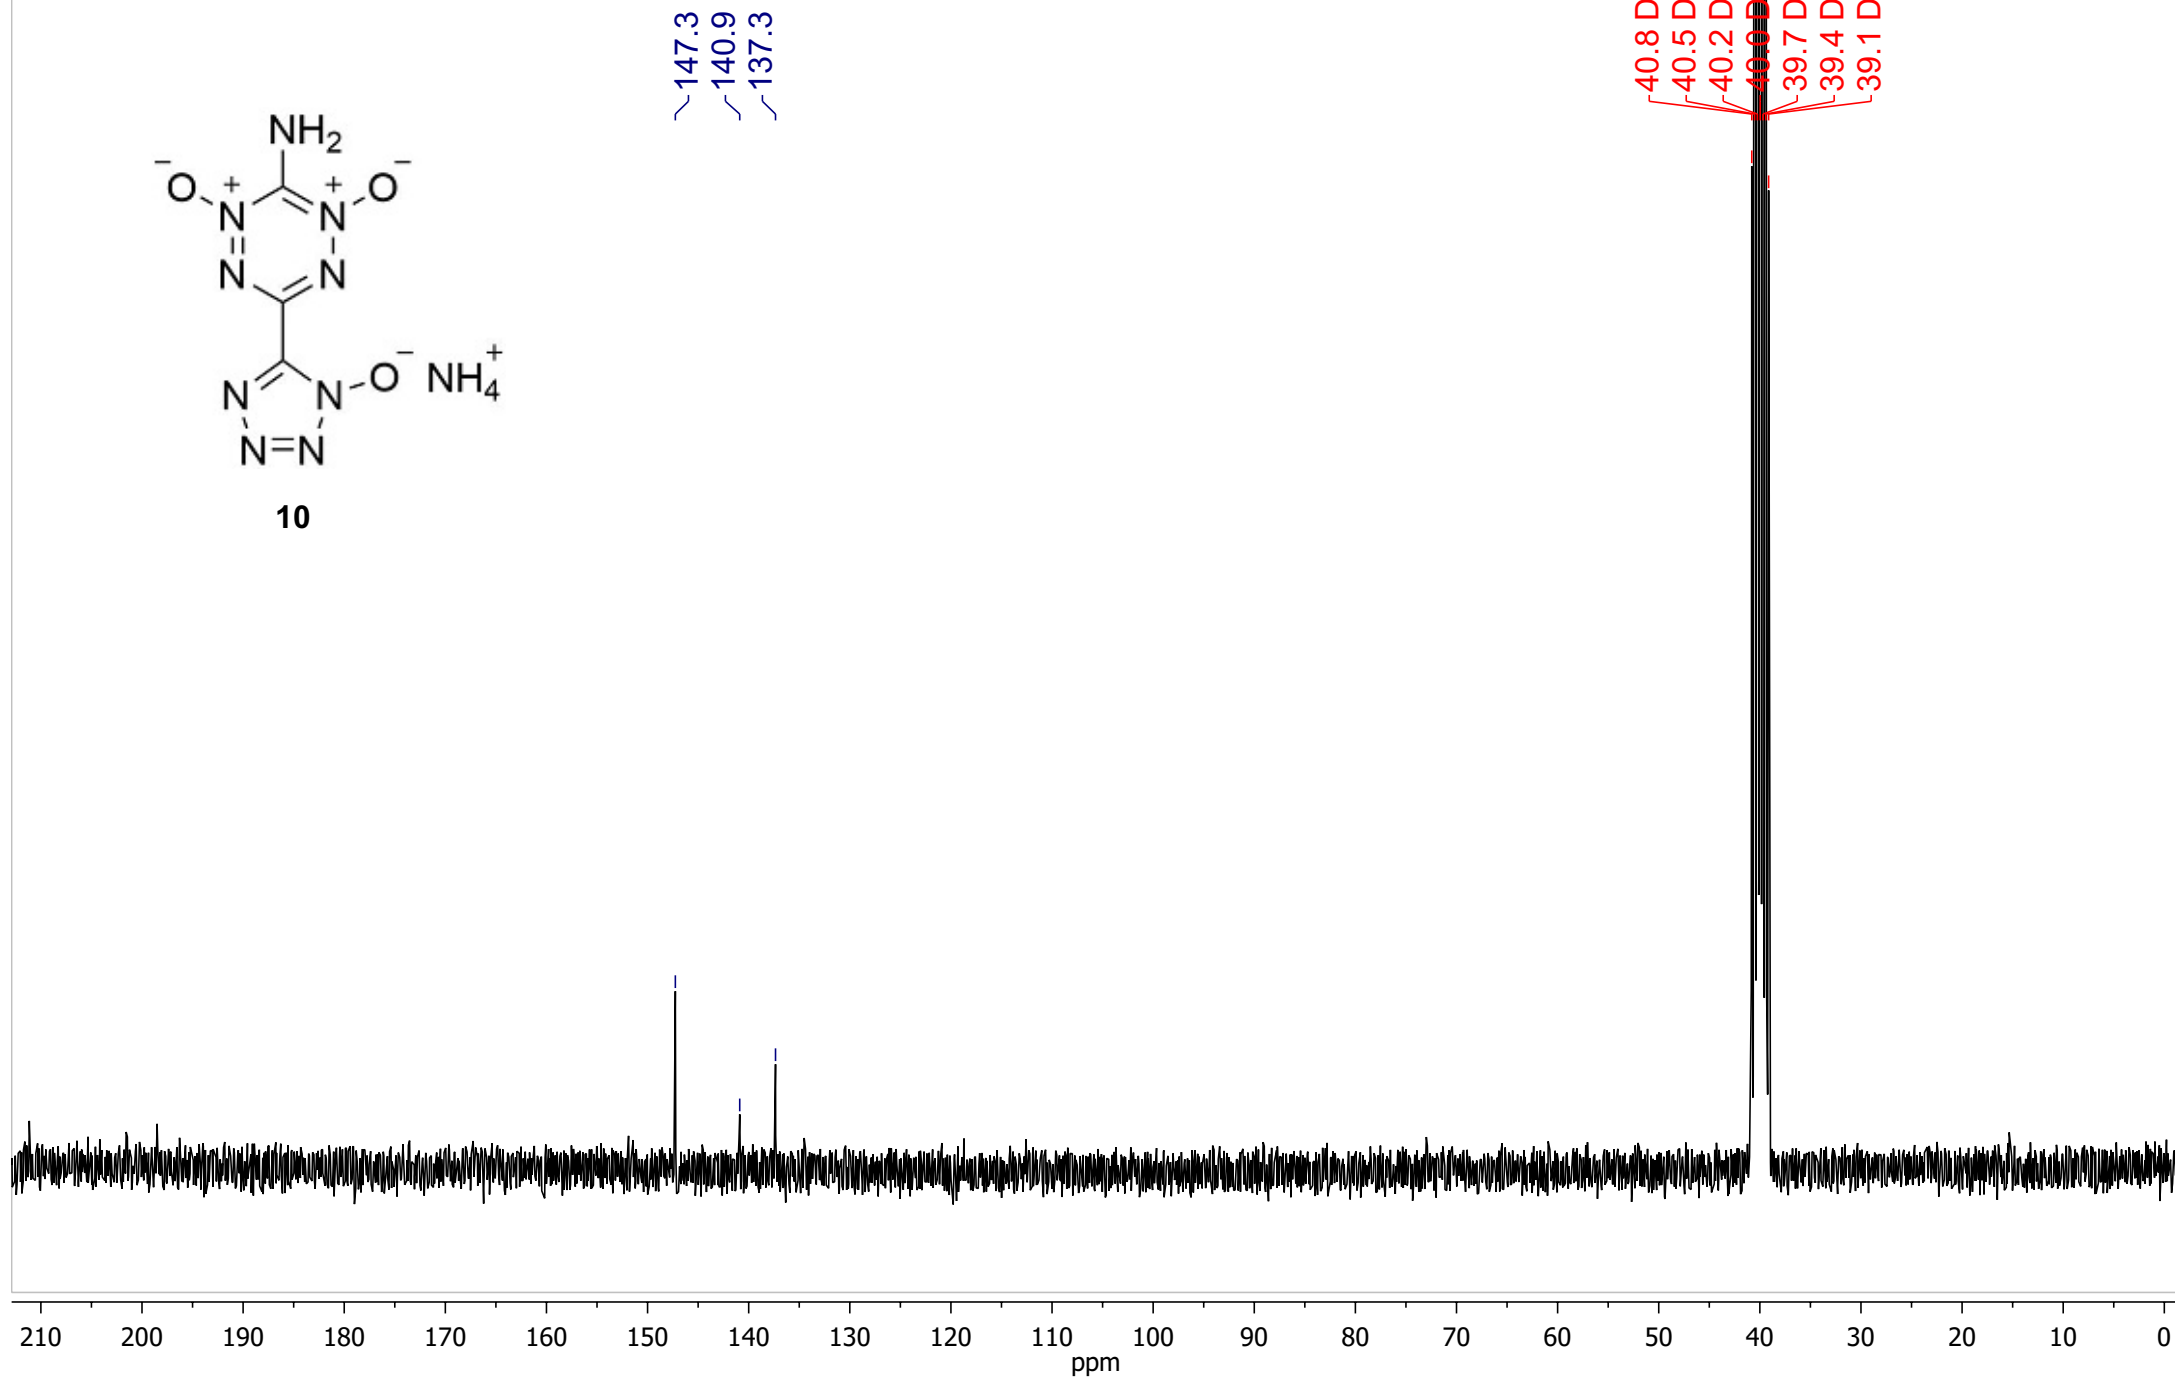



10

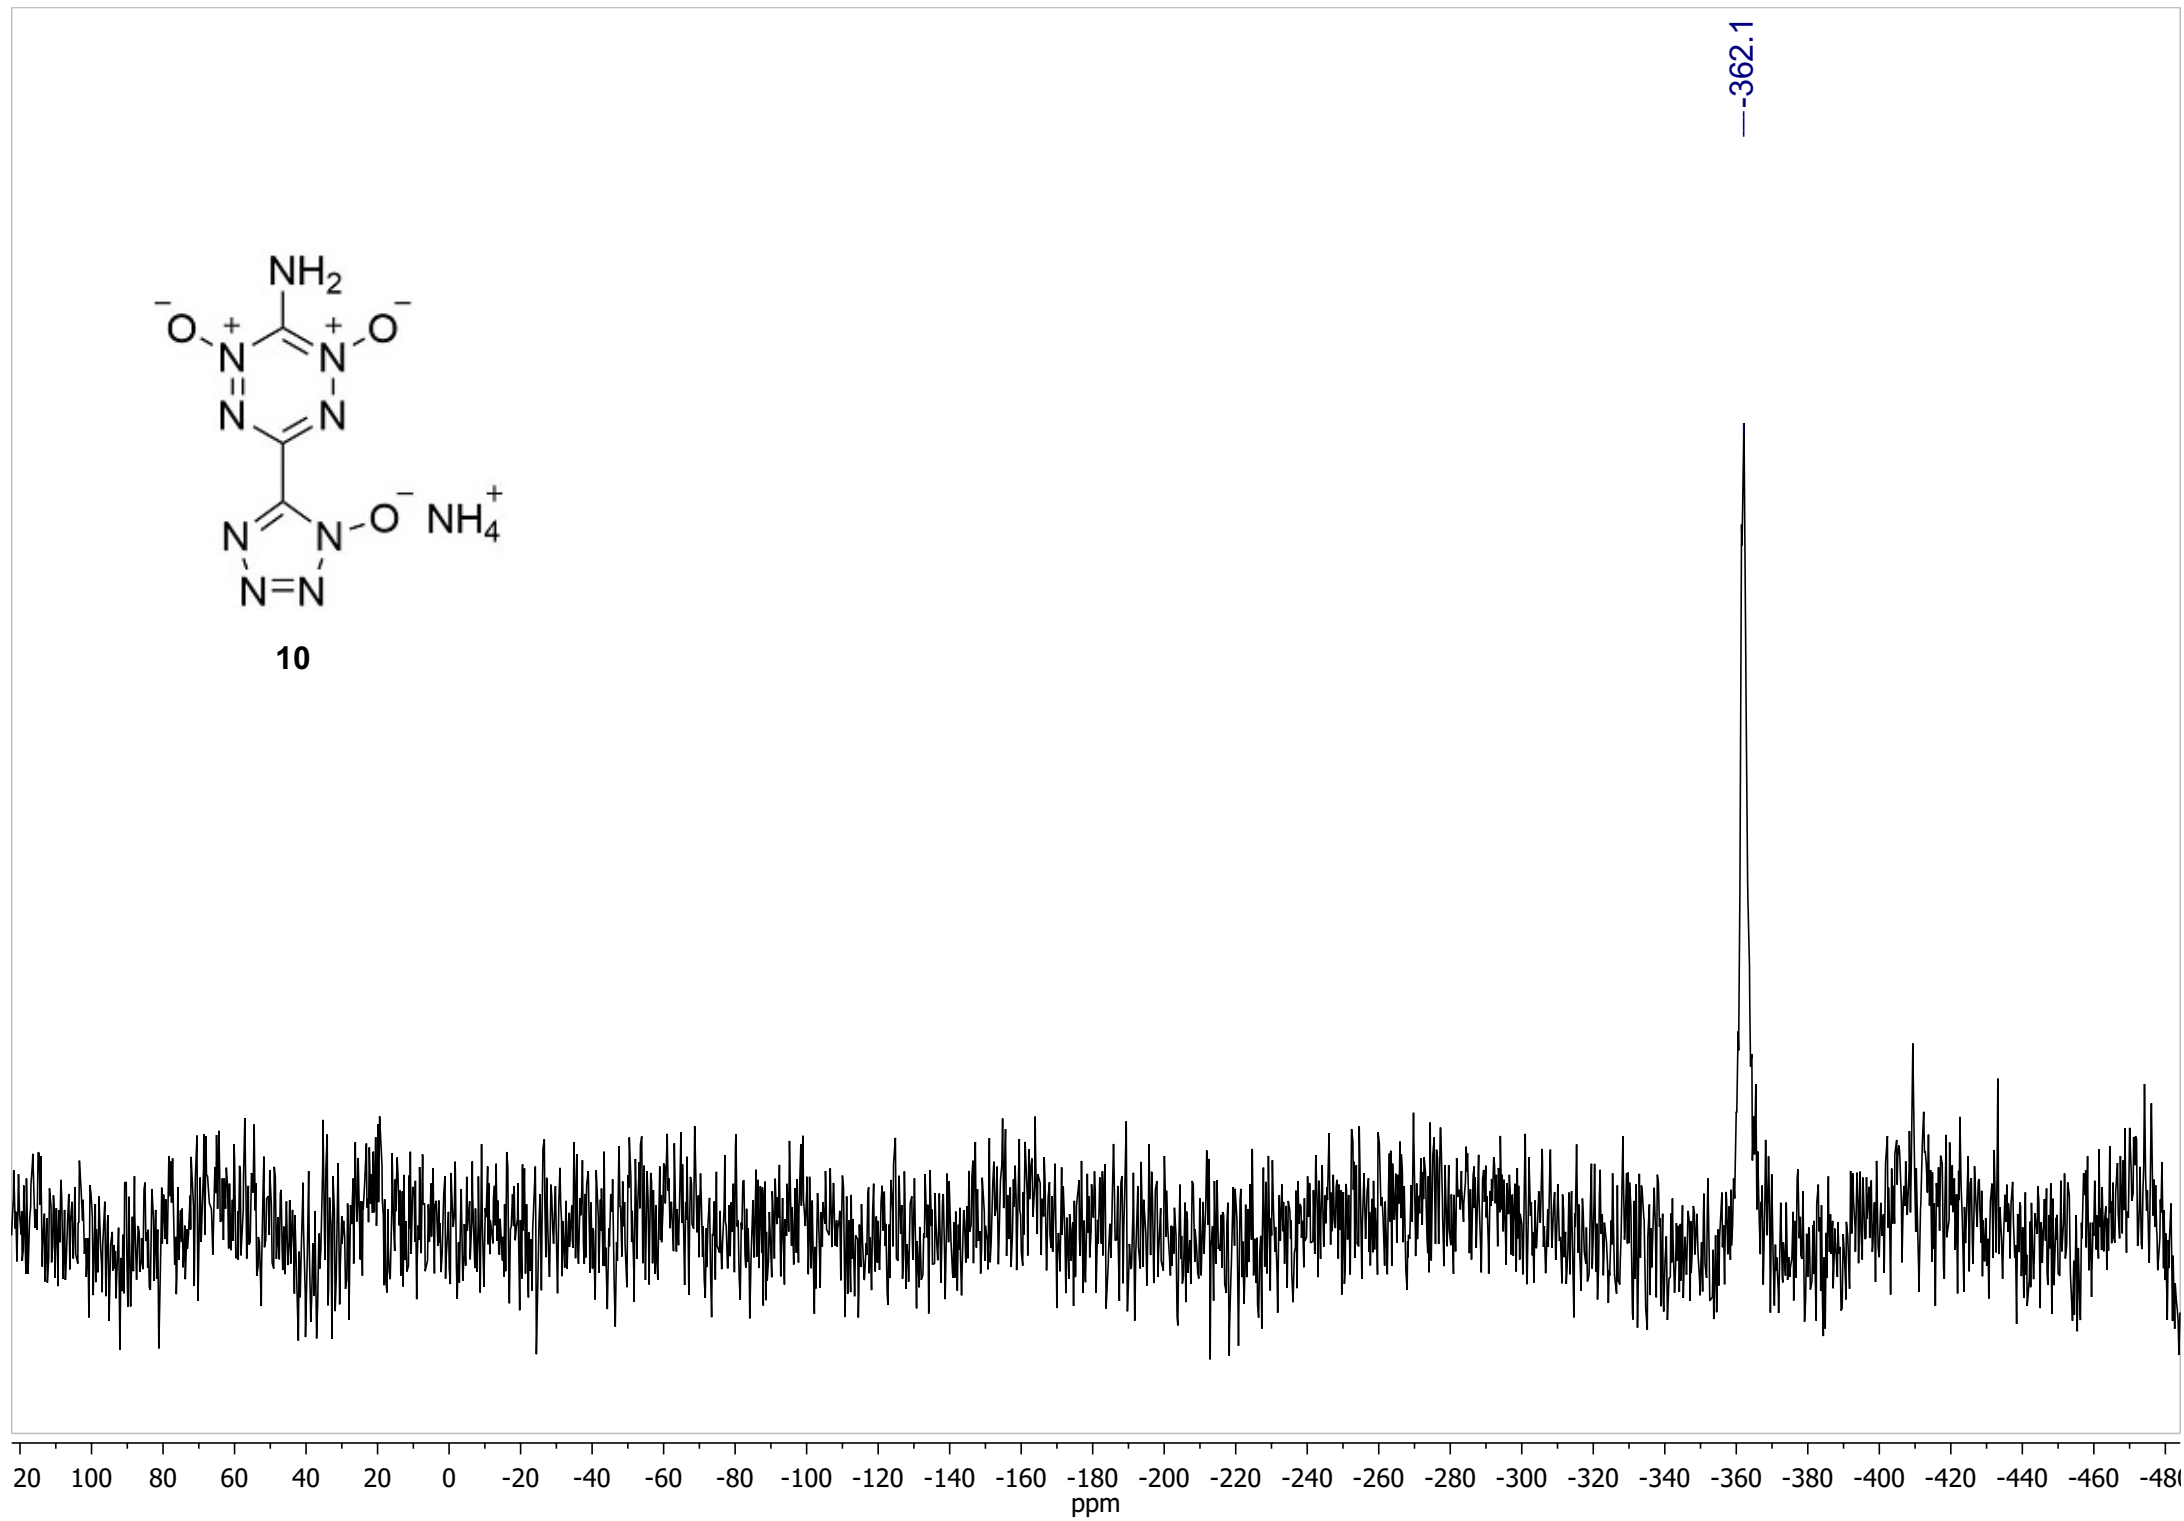



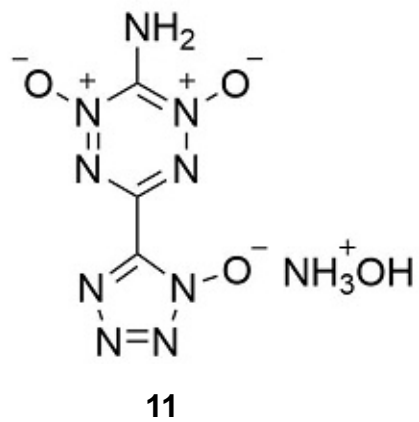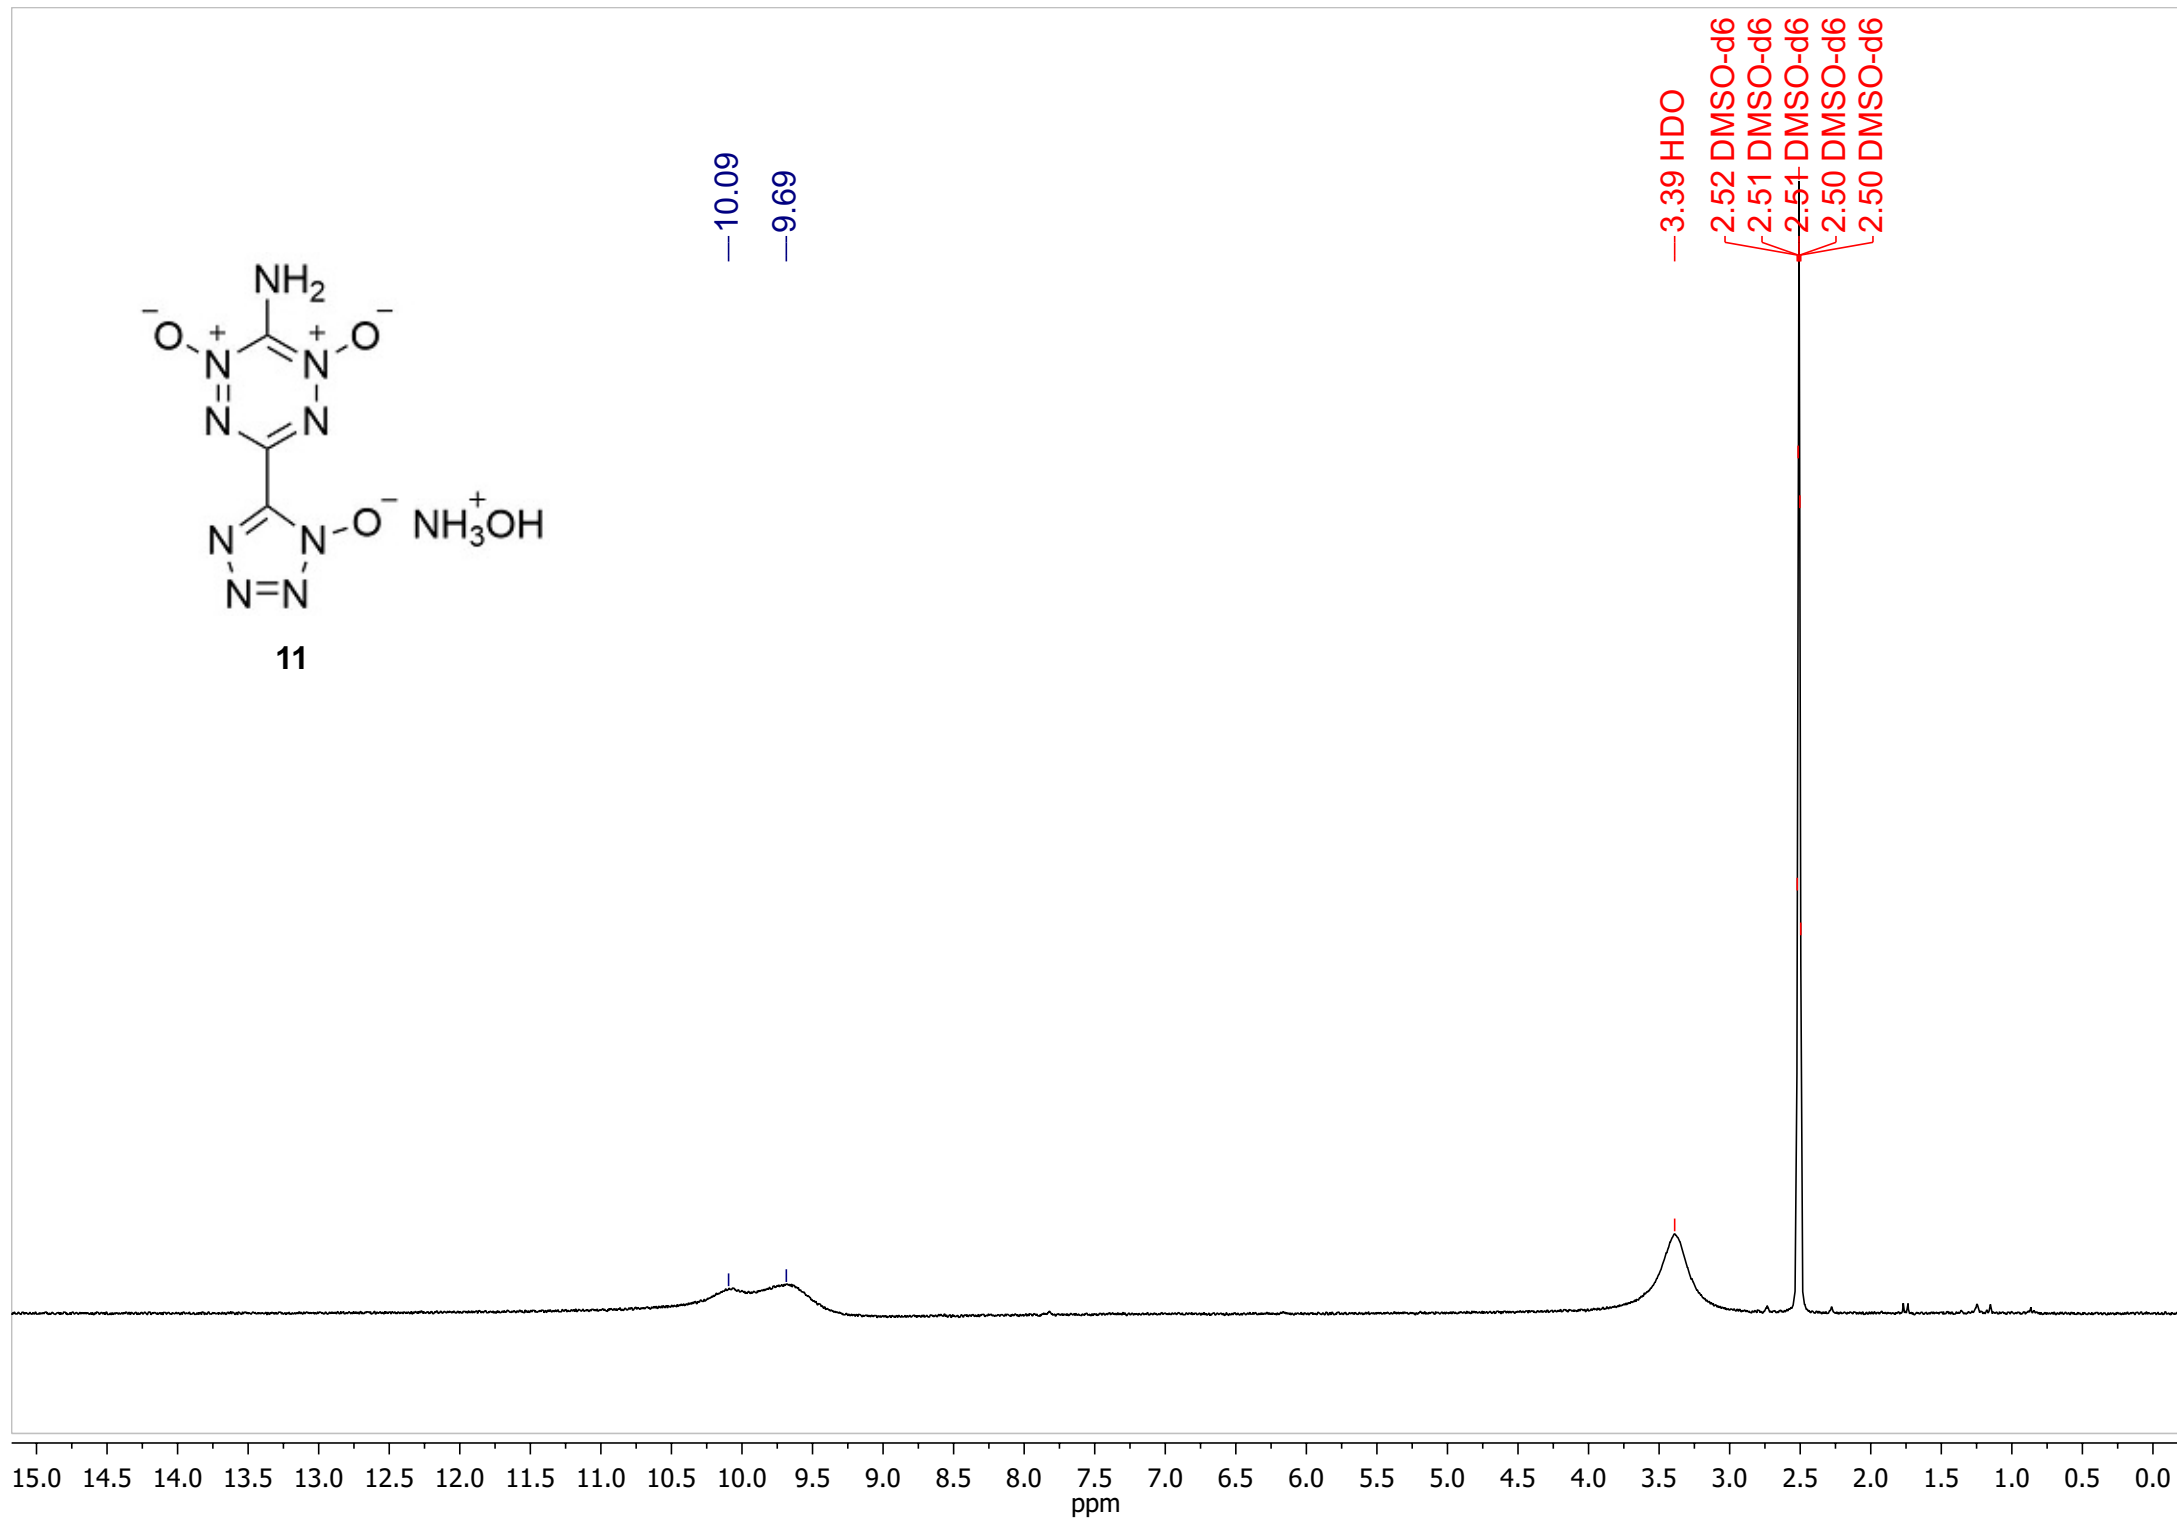

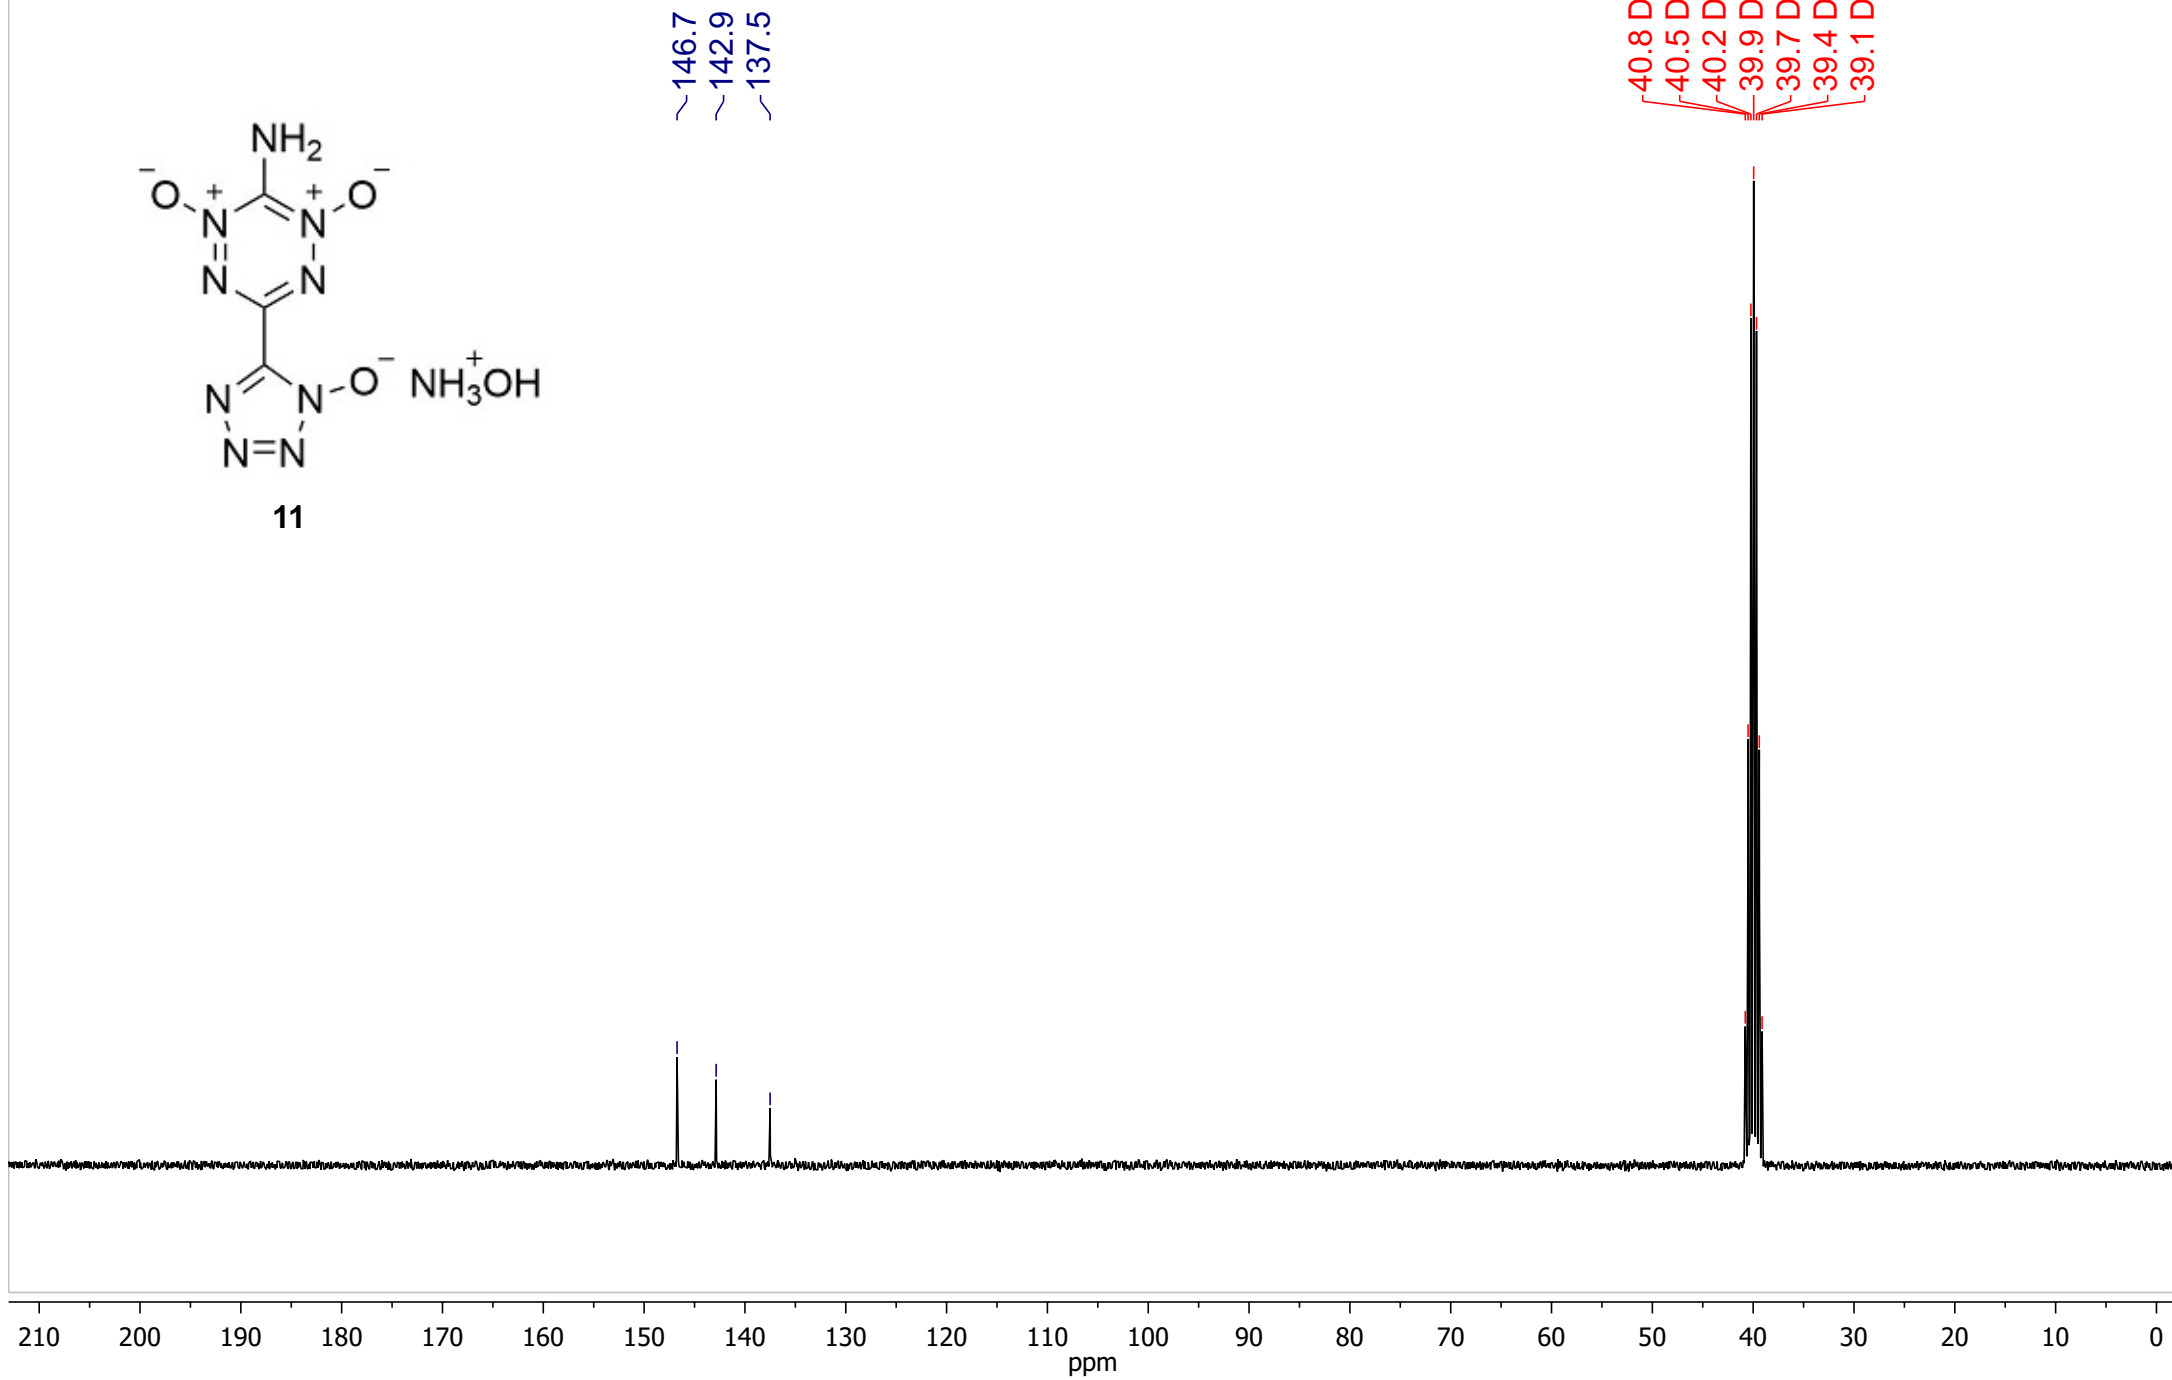

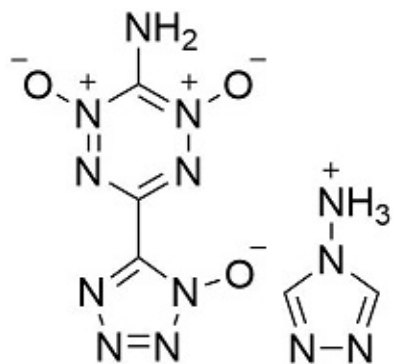

12

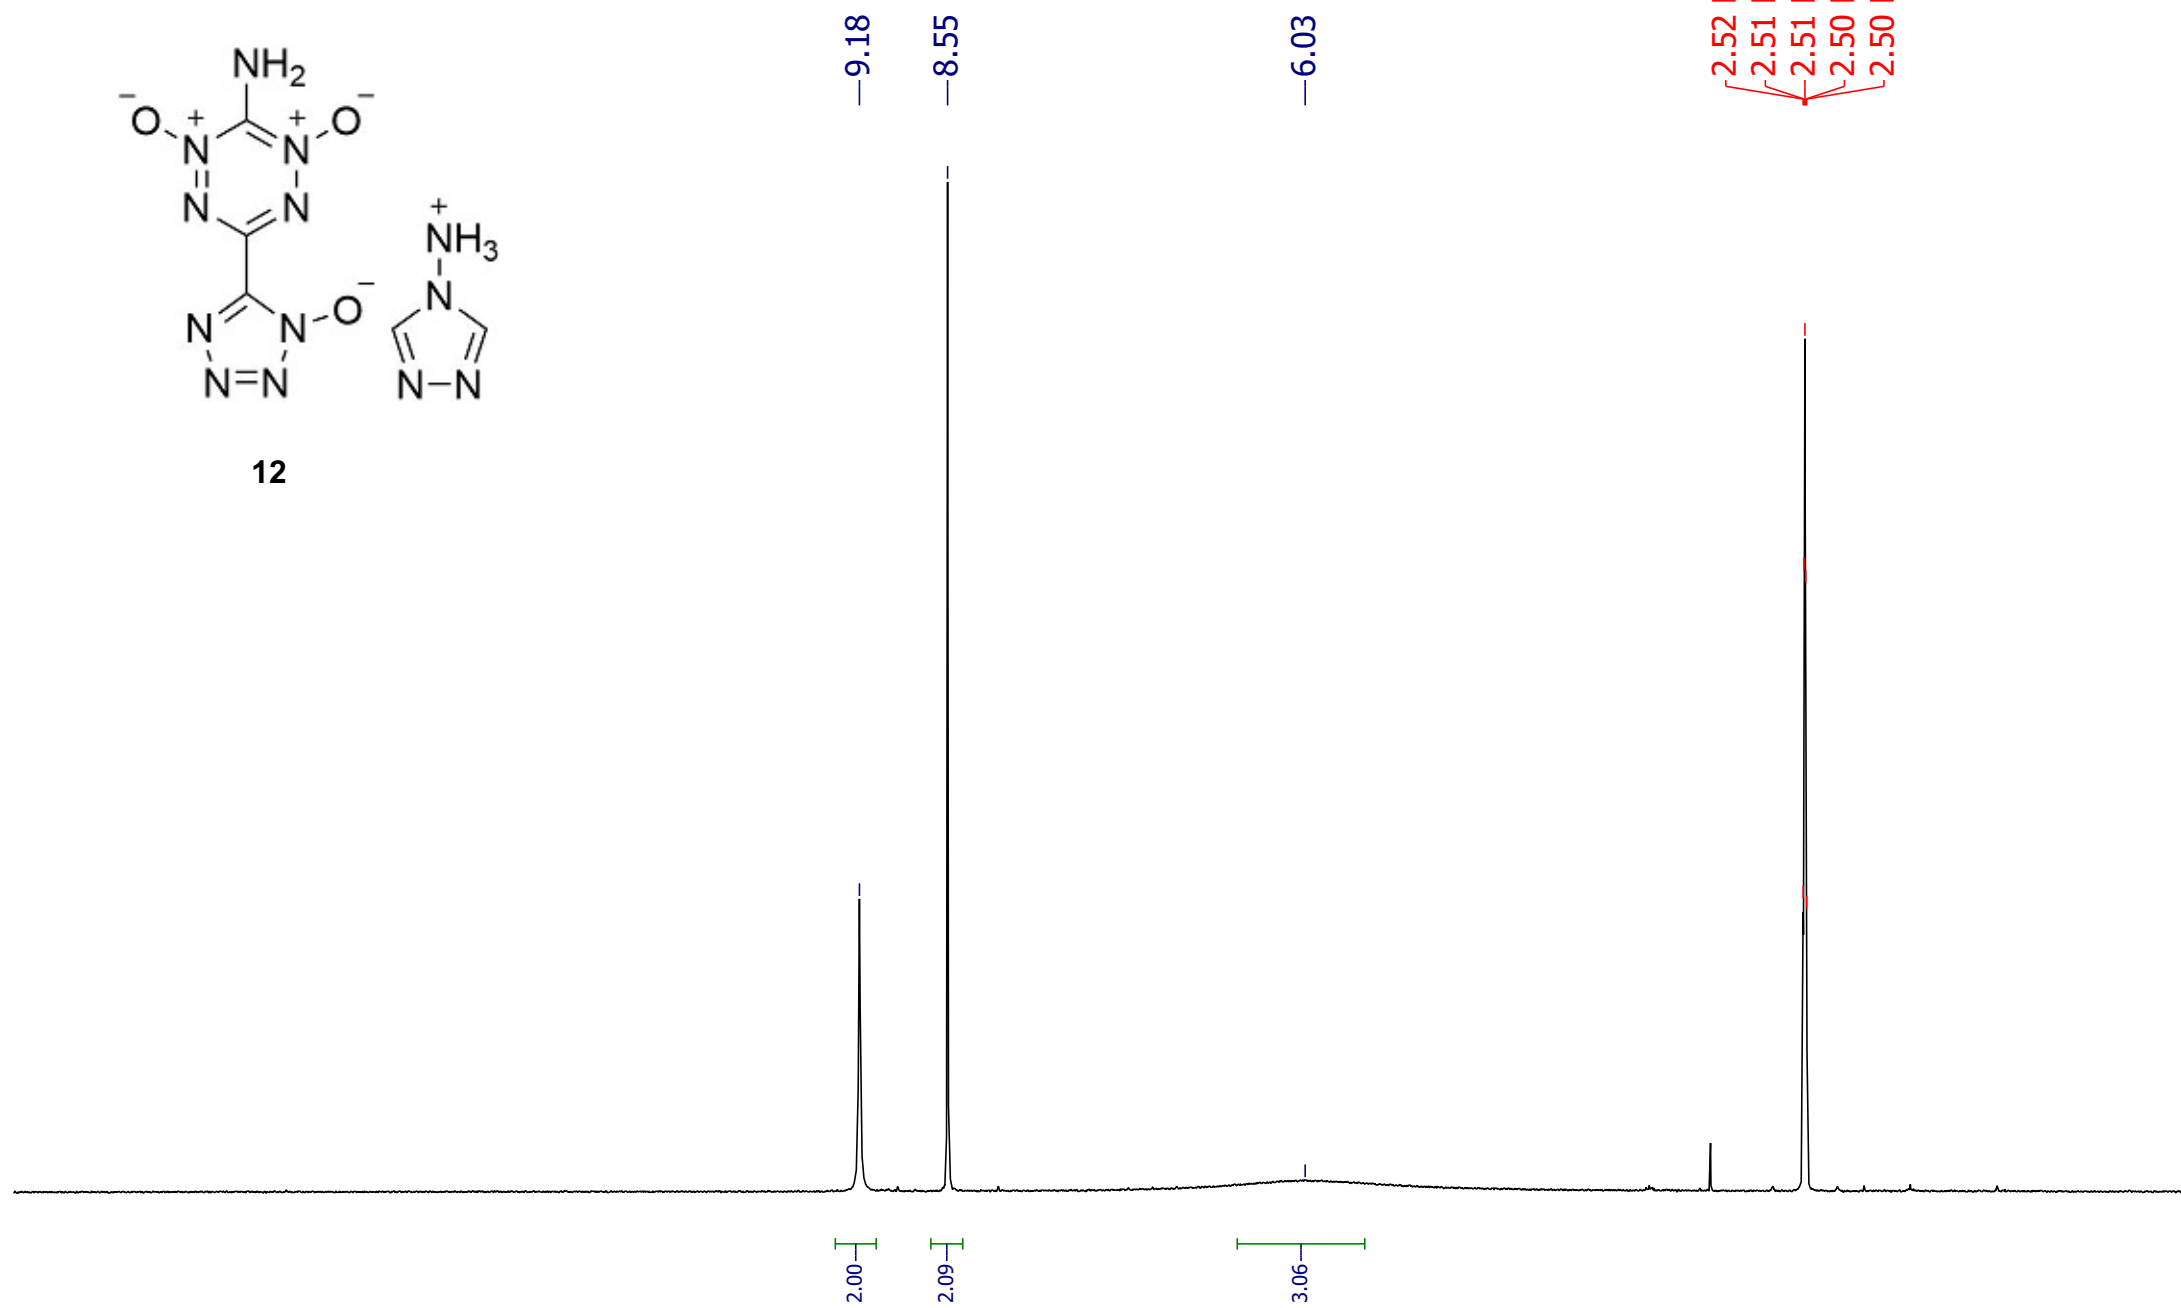

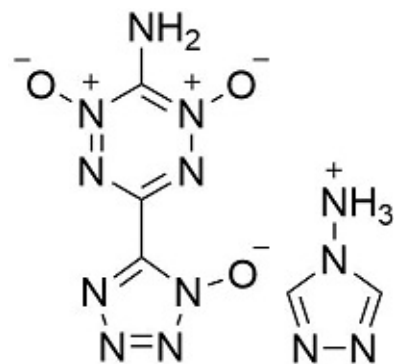

12

147.8  
144.5  
140.9  
140.2

40.8 DMSO-d6  
40.5 DMSO-d6  
40.2 DMSO-d6  
40.0 DMSO-d6  
39.7 DMSO-d6  
39.4 DMSO-d6  
39.1 DMSO-d6

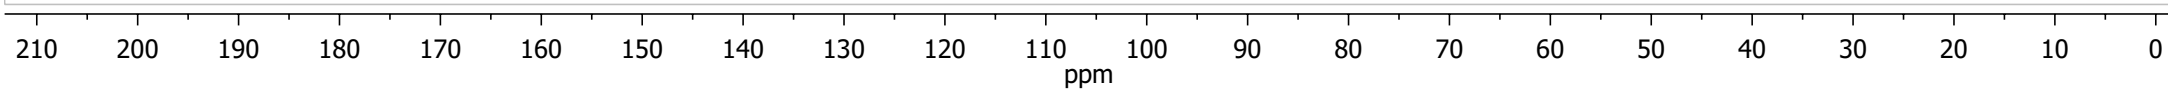

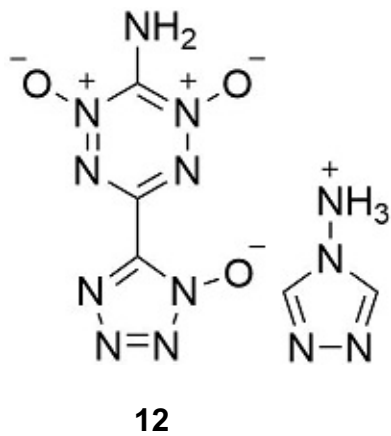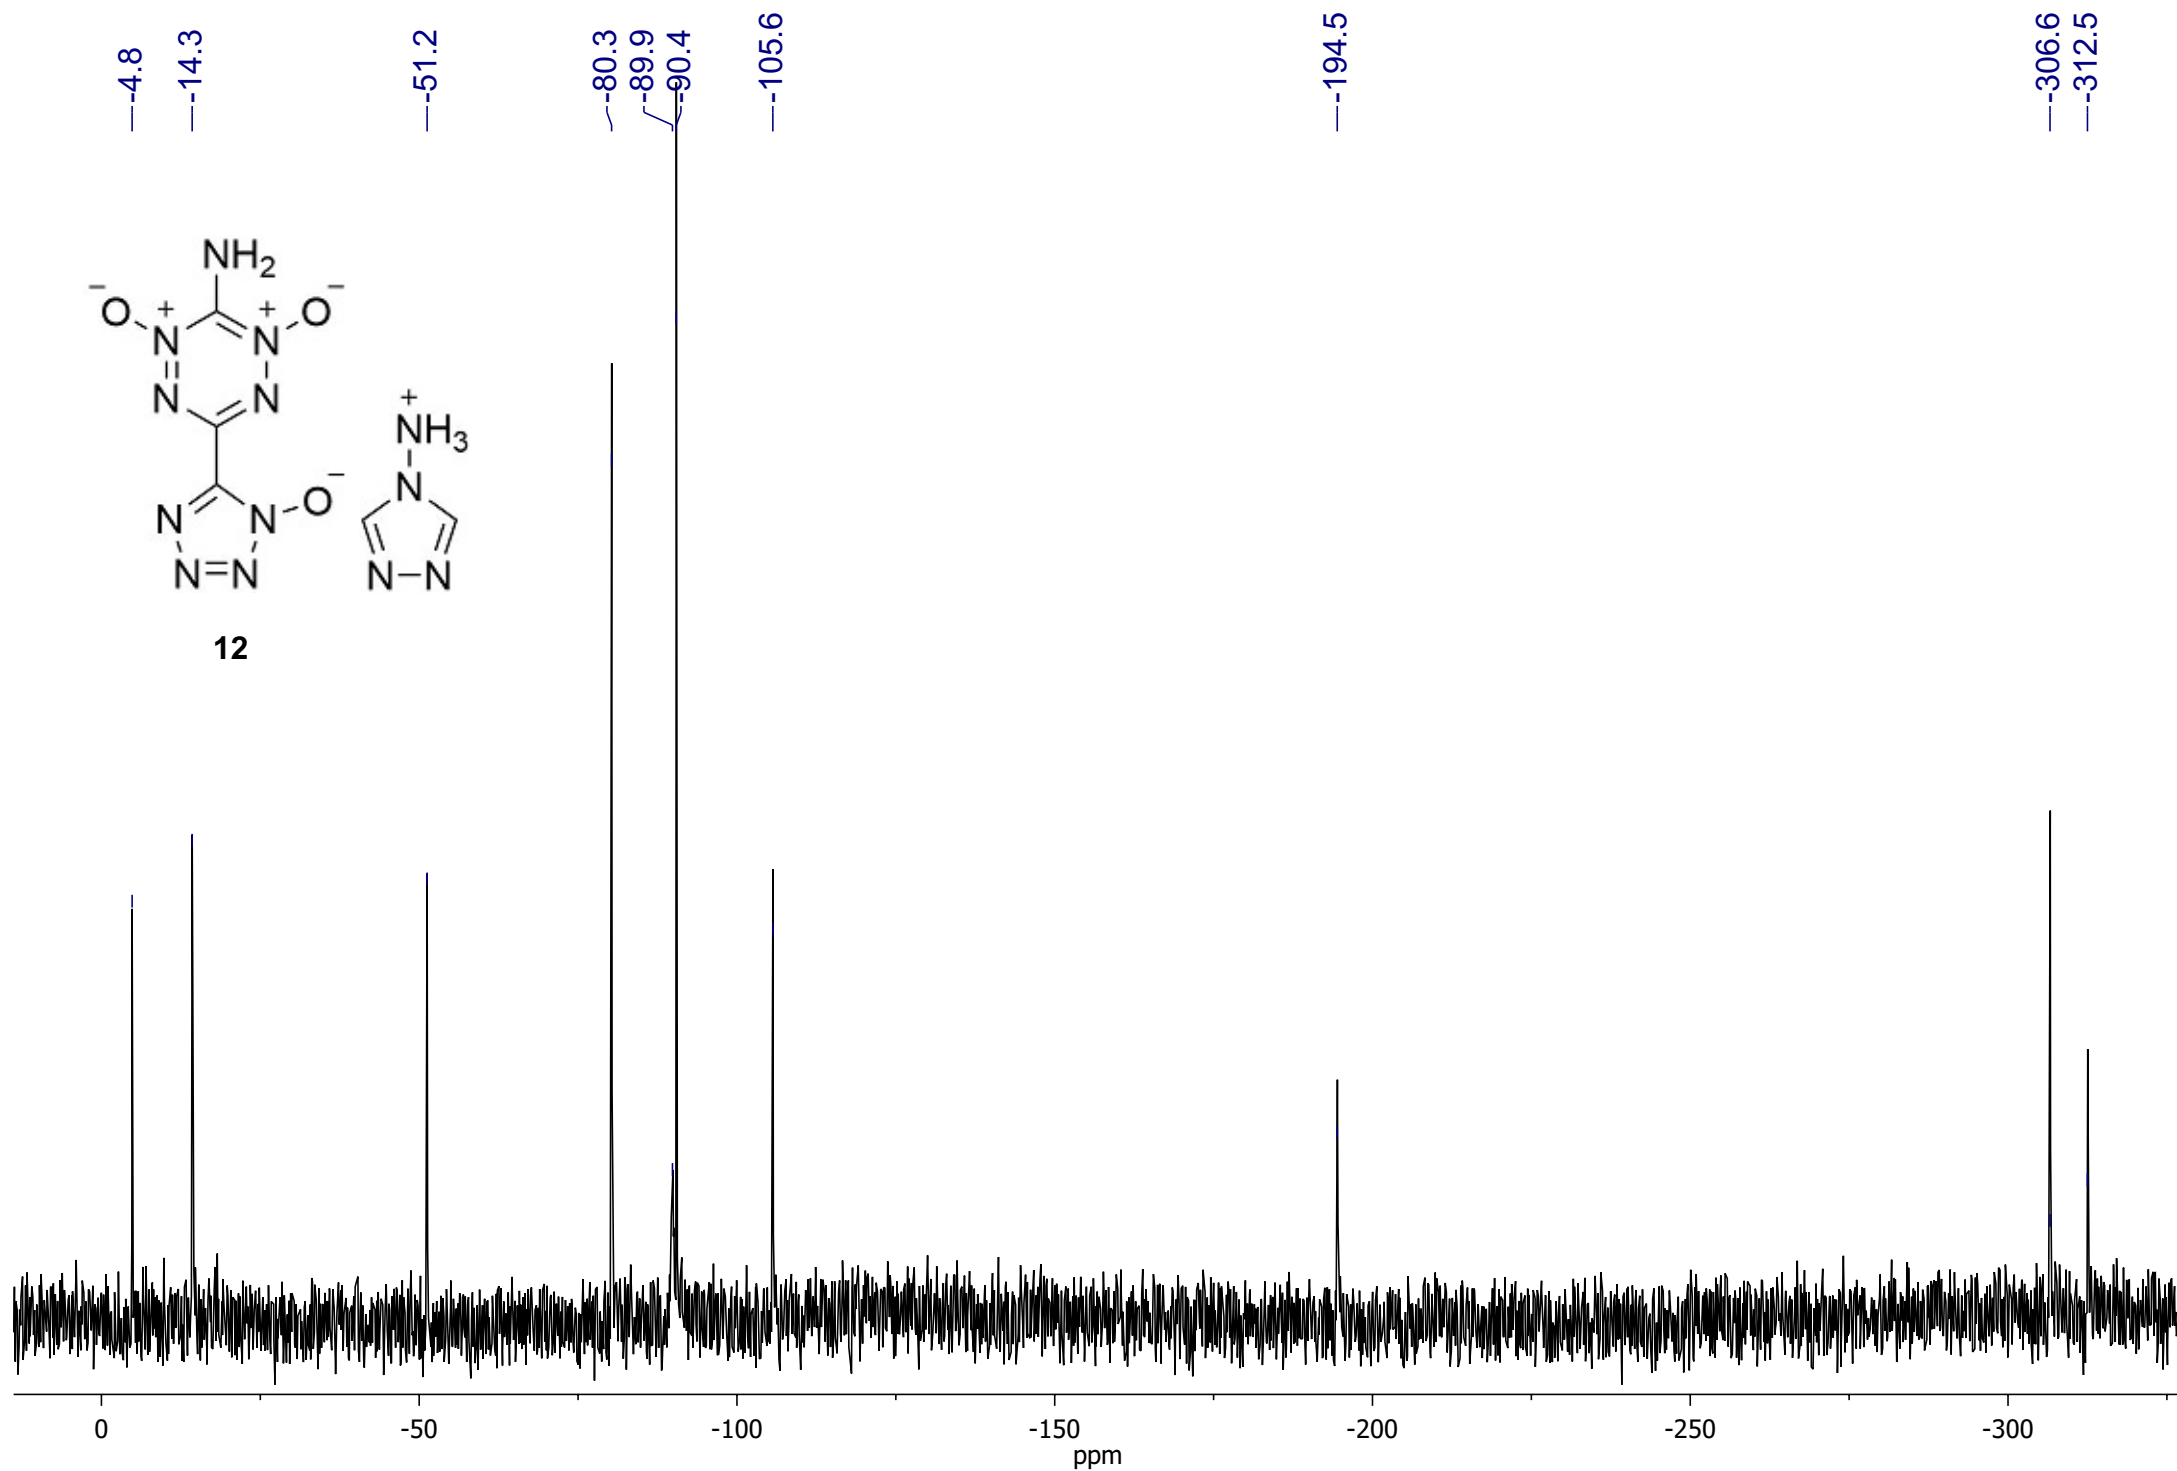

Supplement: s1 [file s1]
